# Supplementary material for: Radical-based regioselective cross-coupling of indoles and cycloalkanes
Source: Royal Society of Chemistry journal article supplement (doi:10.1039/c5cy01907a), 2016-01-01
Supplement: c5cy01907a1.pdf [file c5cy01907a1.pdf]

## Supporting Information

### Radical-Based Regioselective Cross-Coupling of Indoles and Cycloalkanes

Jianmin Xiu, Wenbin Yi\*

School of Chemical Engineering, Nanjing University of Science and Technology, Nanjing, 210094,  
China.

|                                                             |            |
|-------------------------------------------------------------|------------|
| <b>1. General Information.....</b>                          | <b>S2</b>  |
| <b>2. Representative Procedure and Analytical Data.....</b> | <b>S2</b>  |
| <b>3. NMR Spectra.....</b>                                  | <b>S12</b> |
| <b>4. Crystallographic Data.....</b>                        | <b>S38</b> |
| <b>5. Theoretic calculation results of 1c and 1o.....</b>   | <b>S39</b> |

## 1. General Information

All reactions were run using flame-dried glassware and magnetic stirring. Chemicals and solvents were purchased from commercial suppliers and used as received.  $^1\text{H}$  and  $^{13}\text{C}$  NMR spectra were recorded on a 500 MHz Bruker DRX 500 and tetramethylsilane (TMS) was used as a reference. Chemical shifts were reported in parts per million (ppm), and the residual solvent peak was used as an internal reference: proton (chloroform  $\delta$  7.26, acetone  $\delta$  2.09, DMSO  $\delta$  2.50), carbon (chloroform  $\delta$  77.0, acetone  $\delta$  205.87, 30.60, DMSO  $\delta$  40.45). GC-MS were performed on an ISQ Trace 1300 (electrospray ionization: EI). For thin-layer chromatography (TLC), Sorbent silica gel XHL TLC plates (130815) were used, and compounds were visualized with a UV light at 254 nm.

## 2. Representative Procedure and Analytical Data

### Typical Procedure for the synthesis of 3a

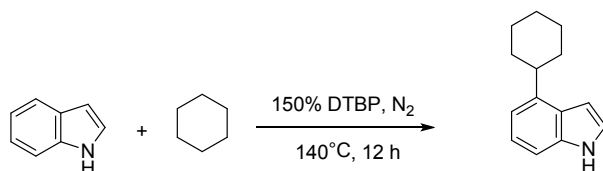

A screw-capped test tube equipped with a magnetic stir bar was added indole **1a** (0.117 g, 1 mmol), DTBP (0.276 mL, 1.5 mmol), cyclohexane (4 mL). After being stirred at 140°C for 12 h under a nitrogen atmosphere, the reaction mixture was cooled to room temperature and diluted with ethyl acetate, washed with water, dried over anhydrous  $\text{Na}_2\text{SO}_4$ . The solvents were removed by rotary evaporation to provide raw products. The residue was then chromatographed on silica gel (eluent: petroleum) to give corresponding **3a** (0.14 g, yield 74%) as light brown needled solid.

### 4-cyclohexyl-1H-indole (3a)

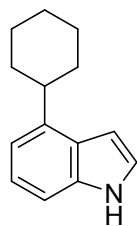

Chemical Formula:  $\text{C}_{14}\text{H}_{17}\text{N}$   
Calculated Exact Mass: 199.14

$^1\text{H}$  NMR (500 MHz,  $\text{CDCl}_3$ )  $\delta$  8.06 (bs, 1H), 7.18 (d, 1H,  $J = 8.1$  Hz), 7.12 (t, 1H,  $J = 2.8$  Hz), 7.09 (t, 1H,  $J = 7.4$  Hz), 6.91 (d, 1H,  $J = 7.2$  Hz), 6.57 (m, 1H), 2.90 (tt, 1H,  $J_1 = 11.9$  Hz,  $J_2 = 3.2$  Hz), 1.96 - 1.94 (m, 2H), 1.83 - 1.80 (m, 2H), 1.74 - 1.71 (m, 1H), 1.56 - 1.38 (m, 4H), 1.29 - 1.21 (m, 1H);

$^{13}\text{C}$  NMR (126 MHz,  $\text{CDCl}_3$ )  $\delta$  140.45 (s), 135.87 (s), 126.69 (s), 123.42 (s), 122.35 (s), 116.04 (s), 108.78 (s), 101.12 (s), 41.96 (s), 33.74 (s), 27.29 (s), 26.61 (s);

**MS (EI):** 199.20 ( $M^+$ ).

**4-cyclohexyl-5-fluoro-1H-indole (3b)**

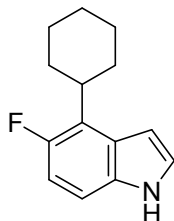

Chemical Formula:  $C_{14}H_{16}FN$   
Calculated Exact Mass: 217.13

**$^1H$  NMR (500 MHz,  $CDCl_3$ )**  $\delta$  8.03 (bs, 1H), 7.13 (t, 1H,  $J = 2.8$ Hz), 7.07 - 7.04 (dd, 1H,  $J_1 = 5.3$  Hz,  $J_2 = 3.5$  Hz), 6.85 - 6.81 (dd, 1H,  $J_1 = 8.8$  Hz,  $J_2 = 2.5$  Hz), 6.61 (s, 1H), 3.05 (tt, 1H,  $J_1 = 12.2$  Hz,  $J_2 = 3.5$  Hz), 1.95 - 1.87 (m, 2H), 1.81 - 1.71 (m, 5H), 1.41 - 1.28 (m, 3H);

**$^{13}C$  NMR (126 MHz,  $CDCl_3$ )**  $\delta$  156.32 (d,  $J = 233.1$  Hz), 132.58 (s), 127.25 (s), 124.74 (s), 124.40 (d,  $J = 13.9$  Hz), 111.47 (d,  $J = 29.0$  Hz), 109.23 (d,  $J = 10.1$  Hz), 102.47 (s), 38.62 (s), 31.71 (s), 27.31 (s), 26.39 (s);

**MS (EI):** 217.16 ( $M^+$ ).

**5-chloro-4-cyclohexyl-1H-indole (3c)**

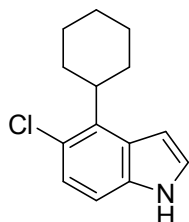

Chemical Formula:  $C_{14}H_{16}ClN$   
Calculated Exact Mass: 233.10

**$^1H$  NMR (500 MHz,  $CDCl_3$ )**  $\delta$  8.04 (bs, 1H), 7.11 - 7.05 (m, 3H), 6.72 (s, 1H), 3.41 (s, 1H), 2.01 (s, 2H), 1.83 - 1.73 (dd, 5H,  $J_1 = 39$  Hz,  $J_2 = 13$  Hz), 1.44 - 1.27 (m, 3H);

**$^{13}C$  NMR (126 MHz,  $CDCl_3$ )**  $\delta$  136.25 (s), 136.10 (s), 124.16 (s), 124.00 (s), 110.02 (s), 103.18 (s), 41.88 (s), 31.20 (s), 27.27 (s), 26.48 (s);

**MS (EI):** 233.12 ( $M^+$ ).

**5-bromo-4-cyclohexyl-1H-indole (3d)**

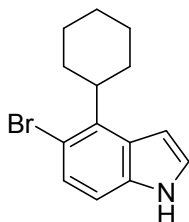

Chemical Formula:  $C_{14}H_{16}BrN$   
Calculated Exact Mass: 277.05

**$^1H$  NMR (500 MHz,  $CDCl_3$ )**  $\delta$  8.14 (bs, 1H), 7.36 (d, 1H,  $J = 8.6$  Hz), 7.17 (t, 1H,  $J$

= 2.8Hz), 7.09 (d, 1H, J = 8.6 Hz), 6.82 (s, 1H), 3.49 (s, 1H), 2.07 (s, 1H), 1.91 - 1.82 (dd, 5H, J1 = 34.2 Hz, J2 = 13 Hz), 1.53 - 1.35 (m, 3H);

**<sup>13</sup>C NMR (126 MHz, CDCl<sub>3</sub>)** δ 138.00 (s), 135.69 (s), 126.71 (s), 123.77 (s), 114.90 (s), 110.54 (s), 103.22 (s), 45.13 (s), 31.31 (s), 27.23 (s), 26.47 (s);  
**MS (EI):** 277.09 (M<sup>+</sup>).

#### 4-cyclohexyl-1*H*-indole-5-carbonitrile (3e)

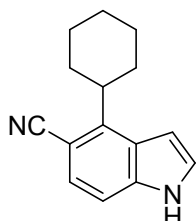

Chemical Formula: C<sub>15</sub>H<sub>16</sub>N<sub>2</sub>  
Calculated Exact Mass: 224.13

**<sup>1</sup>H NMR (500 MHz, CDCl<sub>3</sub>)** δ 8.64 (bs, 1H), 7.38 (d, 1H, J = 8.4 Hz), 7.31 - 7.29 (m, 2H, J = 8.1 Hz), 6.84 (s, 1H), 2.92 (tt, 1H, J1 = 12.4 Hz, J2 = 3.4 Hz), 2.15 - 2.07 (m, 2H), 1.91 - 1.81 (m, 5H), 1.53 - 1.37 (m, 3H);

**<sup>13</sup>C NMR (126 MHz, CDCl<sub>3</sub>)** δ 145.76 (s), 138.10 (s), 126.45 (s), 125.97 (s), 125.05 (s), 120.85 (s), 110.20 (s), 103.50 (s), 101.50 (s), 44.23 (s), 31.91 (s), 26.99 (s), 26.16 (s);  
**MS (EI):** 224.17 (M<sup>+</sup>).

#### 4-cyclohexyl-5-nitro-1*H*-indole (3f)

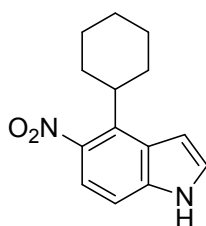

Chemical Formula: C<sub>14</sub>H<sub>16</sub>N<sub>2</sub>O<sub>2</sub>  
Calculated Exact Mass: 244.12

**<sup>1</sup>H NMR (500 MHz, CDCl<sub>3</sub>)** δ 8.47 (bs, 1H), 7.44 (d, 1H, J = 8.7 Hz), 7.25 (t, 1H, J = 2.8Hz), 7.19 (d, 1H, J = 7.7 Hz), 6.87 (s, 1H), 2.92 (tt, 1H, J1 = 12.3 Hz, J2 = 3.4 Hz), 2.06 - 1.98 (m, 2H), 1.84 - 1.74 (m, 5H), 1.41 - 1.28 (m, 3H);

**<sup>13</sup>C NMR (126 MHz, CDCl<sub>3</sub>)** δ 144.16 (s), 137.42 (s), 134.82 (s), 126.03 (s), 125.49 (s), 118.54 (s), 109.39 (s), 105.29 (s), 40.45 (s), 31.69 (s), 26.98 (s), 26.31 (s);  
**MS (EI):** 244.17 (M<sup>+</sup>).

#### 4-cyclohexyl-5-methyl-1*H*-indole (3g)

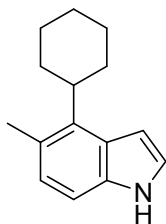

Chemical Formula: C<sub>15</sub>H<sub>19</sub>N  
Calculated Exact Mass: 213.15

**<sup>1</sup>H NMR (500 MHz, CDCl<sub>3</sub>)** δ 8.00 (bs, 1H), 7.14 - 7.12 (m, 2H), 7.00 (d, 1H, J = 8.3 Hz), 6.75 (s, 1H), 3.10 (tt, 1H, J<sub>1</sub> = 14.9 Hz, J<sub>2</sub> = 3.5 Hz), 2.43 (s, 3H), 2.13 - 2.05 (m, 2H), 1.81 - 1.77 (m, 5H), 1.48 - 1.38 (m, 3H);

**<sup>13</sup>C NMR (126 MHz, CDCl<sub>3</sub>)** δ 137.24 (s), 135.61 (s), 125.61 (s), 125.37 (s), 123.00 (s), 108.65 (s), 103.01 (s), 41.32 (s), 31.55 (s), 27.59 (s), 26.64 (s), 20.38 (s);

**MS (EI):** 213.22 (M<sup>+</sup>).

#### 4-cyclohexyl-5-methoxy-1H-indole (3h)

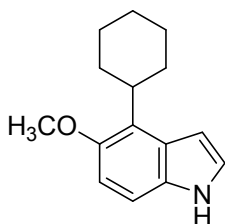

Chemical Formula: C<sub>15</sub>H<sub>19</sub>NO  
Calculated Exact Mass: 229.15

**<sup>1</sup>H NMR (500 MHz, CDCl<sub>3</sub>)** δ 8.00 (bs, 1H), 7.16 - 7.15 (m, 2H), 6.93 (d, 1H, J = 8.8 Hz), 6.69 (s, 1H), 3.83 (s, 3H), 3.32 - 3.28 (m, 1H), 2.11 - 2.03 (m, 2H), 1.87 - 1.75 (m, 5H), 1.49 - 1.35 (m, 3H);

**<sup>13</sup>C NMR (126 MHz, CDCl<sub>3</sub>)** δ 150.94 (s), 132.33 (s), 127.79 (s), 127.30 (s), 124.26 (s), 111.46 (s), 109.02 (s), 102.55 (s), 58.92 (s), 38.23 (s), 31.68 (s), 27.53 (s), 26.64 (s);

**MS (EI):** 229.21 (M<sup>+</sup>).

#### 5-chloro-4-cyclohexyl-2-methyl-1H-indole (3i)

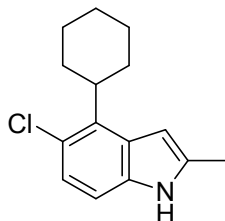

Chemical Formula: C<sub>15</sub>H<sub>18</sub>ClN  
Calculated Exact Mass: 247.11

**<sup>1</sup>H NMR (500 MHz, CDCl<sub>3</sub>)** δ 7.82 (bs, 1H), 7.08 (d, 1H, J = 8.5 Hz), 7.02 (d, 1H, J = 8.5 Hz), 6.45 (s, 1H), 3.43 (s, 1H), 2.43 (s, 3H), 2.05 (s, 2H), 1.89 - 1.77 (m, 5H), 1.50 - 1.35 (m, 3H);

**<sup>13</sup>C NMR (126 MHz, CDCl<sub>3</sub>)** δ 135.26 (s), 134.95 (s), 124.03 (s), 122.74 (s), 109.27 (s), 101.15 (s), 41.76 (s), 31.10 (s), 27.29 (s), 26.50 (s), 13.82 (s);  
**MS (EI):** 247.19 (M<sup>+</sup>).

#### 4-cyclohexyl-2-methyl-1H-indole (3k)

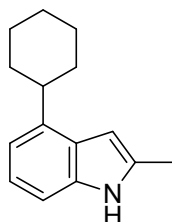

Chemical Formula: C<sub>15</sub>H<sub>19</sub>N  
Calculated Exact Mass: 213.15

**<sup>1</sup>H NMR (500 MHz, CDCl<sub>3</sub>)** δ 7.84 (bs, 1H), 7.13 (d, 1H, J = 8.0 Hz), 7.06 (t, 1H, J = 7.4 Hz), 6.92 (d, 1H, J = 7.2 Hz), 6.30 (s, 1H), 2.89 (tt, 1H, J<sub>1</sub> = 11.9 Hz, J<sub>2</sub> = 3.2 Hz), 2.44 (s, 3H), 2.00 - 1.98 (m, 2H), 1.89 - 1.86 (m, 2H), 1.80 - 1.77 (m, 1H), 1.61 - 1.42 (m, 4H), 1.35 - 1.32 (m, 1H);

**<sup>13</sup>C NMR (126 MHz, CDCl<sub>3</sub>)** δ 139.40 (s), 136.15 (s), 134.31 (s), 127.75 (s), 121.32 (s), 115.97 (s), 108.05 (s), 99.00 (s), 42.04 (s), 33.69 (s), 27.34 (s), 26.64 (s), 13.88 (s);  
**MS (EI):** 213.21 (M<sup>+</sup>).

#### 2-cyclohexyl-1H-indole-3-carbonitrile (3l)

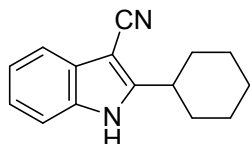

Chemical Formula: C<sub>15</sub>H<sub>16</sub>N<sub>2</sub>  
Calculated Exact Mass: 224.13

**<sup>1</sup>H NMR (500 MHz, CDCl<sub>3</sub>)** δ 8.52 (bs, 1H), 7.67 (m, 1H), 7.37 (m, 1H), 7.24 (m, 2H), 6.29 (s, 1H), 3.05 (tt, 1H, J<sub>1</sub> = 12.2 Hz, J<sub>2</sub> = 3.5 Hz), 2.09 - 2.07 (m, 2H), 1.92 - 1.90 (m, 2H), 1.82 - 1.80 (m, 1H), 1.64 - 1.42 (m, 4H), 1.34 - 1.26 (m, 1H);

**<sup>13</sup>C NMR (126 MHz, CDCl<sub>3</sub>)** δ 153.54 (s), 134.21 (s), 127.93 (s), 123.44 (s), 122.13 (s), 119.16 (s), 116.54 (s), 111.45 (s), 83.52 (s), 37.70 (s), 32.52 (s), 26.24 (s), 25.78 (s);  
**MS (EI):** 224.17 (M<sup>+</sup>).

#### 2-cyclohexyl-4-methyl-1H-indole (3m)

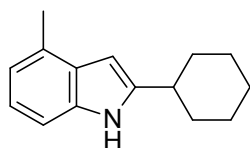

Chemical Formula: C<sub>15</sub>H<sub>19</sub>N  
Calculated Exact Mass: 213.15

**<sup>1</sup>H NMR (500 MHz, CDCl<sub>3</sub>)** δ 7.92 (bs, 1H), 7.16 (d, 1H, J = 8.1 Hz), 7.03 (t, 1H, J = 7.3 Hz), 6.88 (d, 1H, J = 7.2 Hz), 6.25 (m, 1H), 2.74 (tt, 1H, J<sub>1</sub> = 11.3 Hz, J<sub>2</sub> = 3.3

Hz), 2.12 - 2.09 (m, 2H), 1.89 - 1.86 (m, 2H), 1.78 - 1.76 (m, 1H), 1.52 - 1.39 (m, 4H), 1.34 - 1.28 (m, 1H);

**<sup>13</sup>C NMR (126 MHz, CDCl<sub>3</sub>)** δ 144.57 (s), 135.28 (s), 129.48 (s), 128.51 (s), 121.19 (s), 119.84 (s), 108.04 (s), 96.10 (s), 37.52 (s), 33.19 (s), 26.41 (s), 26.26 (s), 18.98 (s);  
**MS (EI):** 213.23 (M<sup>+</sup>).

#### 7-cyclohexyl-6-fluoro-1H-indole (3n-1)

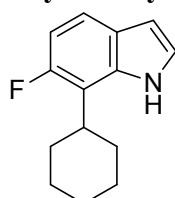

Chemical Formula: C<sub>14</sub>H<sub>16</sub>FN  
Calculated Exact Mass: 217.13

**<sup>1</sup>H NMR (500 MHz, CDCl<sub>3</sub>)** δ 8.22 (bs, 1H), 7.40 - 7.37 (m, 1H), 7.18 (t, 1H, J = 2.8 Hz) 6.88 - 6.84 (m, 1H), 6.53 - 6.52 (m, 1H), 3.01 - 2.95 (m, 1H), 1.92 - 1.89 (m, 6H), 1.83 - 1.80 (m, 1H), 1.49 - 1.35 (m, 3H);

**<sup>13</sup>C NMR (126 MHz, CDCl<sub>3</sub>)** δ 158.51 (d, J = 236.9Hz), 134.68 (d, J = 10.1 Hz), 124.59 (s), 124.05 (s), 118.87 (d, J = 10.1 Hz), 116.08 (d, J = 18.9 Hz), 109.74 (d, J = 27.7 Hz), 103.09 (s), 37.54 (s), 31.80 (s), 27.29 (s), 26.30 (s);  
**MS (EI):** 217.14 (M<sup>+</sup>).

#### 4-cyclohexyl-6-fluoro-1H-indole (3n-2)

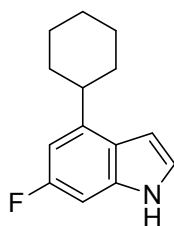

Chemical Formula: C<sub>14</sub>H<sub>16</sub>FN  
Calculated Exact Mass: 217.13

**<sup>1</sup>H NMR (500 MHz, CDCl<sub>3</sub>)** δ 8.04 (bs, 1H), 7.10 (m, 1H), 6.87 - 6.85 (dd, 1H, J<sub>1</sub> = 9.3 Hz, J<sub>2</sub> = 1.5 Hz), 6.76 - 6.74 (dd, 1H, J<sub>1</sub> = 11.3 Hz, J<sub>2</sub> = 2.1 Hz), 6.58 (t, 1H, J = 2.1Hz), 2.94 (tt, 1H, J<sub>1</sub> = 14.4 Hz, J<sub>2</sub> = 2.9 Hz), 2.00 (d, 2H, J = 11.9 Hz), 1.88 (d, 2H, J = 12.3 Hz), 1.80 (d, 1H, J = 13.0 Hz), 1.56 - 1.42 (m, 4H), 1.34 - 1.26 (m, 1H);

**<sup>13</sup>C NMR (126 MHz, CDCl<sub>3</sub>)** δ 161.46 (d, J = 238.1Hz), 142.04 (d, J = 7.6 Hz), 135.65 (d, J = 12.6 Hz), 123.69 (s), 123.18 (s), 105.37 (d, J = 25.2 Hz), 101.17 (s), 95.04 (d, J = 26.5 Hz), 41.80 (s), 33.66 (s), 27.16 (s), 26.53 (s);

**MS (EI):** 217.18 (M<sup>+</sup>).

**6-chloro-7-cyclohexyl-1H-indole (3o-1)**

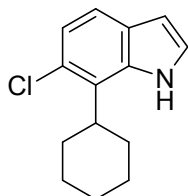

Chemical Formula: C<sub>14</sub>H<sub>16</sub>ClN

Calculated Exact Mass: 233.10

**<sup>1</sup>H NMR (500 MHz, CDCl<sub>3</sub>)** δ 8.29 (bs, 1H), 7.31 (d, 1H, J = 8.4 Hz), 7.11 (t, 1H, J = 3.0 Hz), 7.04 (d, 1H, J = 8.4 Hz), 6.44 (s, 1H), 3.38 (s, 1H), 1.86 - 1.77 (m, 7H), 1.45 - 1.25 (m, 3H);

**<sup>13</sup>C NMR (126 MHz, CDCl<sub>3</sub>)** δ 134.80 (s), 130.38 (s), 129.04 (s), 126.91 (s), 124.17 (s), 122.24 (s), 119.32 (s), 102.88 (s), 40.73 (s), 31.38 (s), 27.18 (s), 26.43 (s);

**MS (EI):** 233.13 (M<sup>+</sup>).

**6-chloro-4-cyclohexyl-1H-indole (3o-2)**

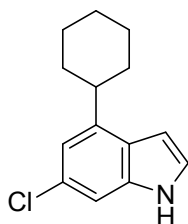

Chemical Formula: C<sub>14</sub>H<sub>16</sub>ClN

Calculated Exact Mass: 233.10

**<sup>1</sup>H NMR (500 MHz, CDCl<sub>3</sub>)** δ 8.05 (bs, 1H), 7.17 (s, 1H), 7.12 (t, 1H, J = 2.8 Hz), 6.94 (d, 1H, J = 1.5 Hz), 6.57 (s, 1H), 2.92 (tt, 1H, J<sub>1</sub> = 11.7 Hz, J<sub>2</sub> = 3.1 Hz), 1.98 - 1.96 (m, 2H), 1.88 - 1.86 (m, 2H), 1.79 - 1.77 (m, 1H), 1.57 - 1.41 (m, 4H), 1.33 - 1.26 (m, 1H);

**<sup>13</sup>C NMR (126 MHz, CDCl<sub>3</sub>)** δ 141.81 (s), 136.16 (s), 128.30 (s), 125.40 (s), 124.12 (s), 117.20 (s), 108.76 (s), 101.28 (s), 41.87 (s), 33.64 (s), 27.18 (s), 26.52 (s);

**MS (EI):** 233.06 (M<sup>+</sup>).

**7-bromo-2-cyclohexyl-1H-indole (3p-1)**

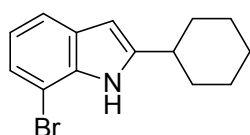

Chemical Formula: C<sub>14</sub>H<sub>16</sub>BrN

Calculated Exact Mass: 277.05

**<sup>1</sup>H NMR (500 MHz, CDCl<sub>3</sub>)** δ 8.04 (bs, 1H), 7.46 (d, 1H, J = 7.9 Hz), 7.25 (d, 1H, J = 7.5 Hz), 6.94 (t, 1H, J = 7.8 Hz), 6.30 (d, 1H, J = 1.9 Hz), 2.74 (tt, 1H, J<sub>1</sub> = 11.4 Hz, J<sub>2</sub> = 3.3 Hz), 2.11 (d, 2H, J = 12.7 Hz), 1.88 (d, 2H, J = 12.9 Hz), 1.77 (d, 1H, J = 12.9 Hz), 1.53 - 1.39 (m, 4H), 1.34 - 1.27 (m, 1H);



**<sup>13</sup>C NMR (126 MHz, CDCl<sub>3</sub>)** δ 145.98 (s), 134.32 (s), 129.93 (s), 123.36 (s), 120.86 (s), 119.18 (s), 104.12 (s), 98.88 (s), 37.47 (s), 33.04 (s), 26.34 (s), 26.17 (s);  
**MS (EI):** 277.09 (M<sup>+</sup>).

#### 7-bromo-4-cyclohexyl-1H-indole (3p-2)

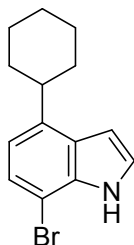

Chemical Formula: C<sub>14</sub>H<sub>16</sub>BrN  
Calculated Exact Mass: 277.05

**<sup>1</sup>H NMR (500 MHz, CDCl<sub>3</sub>)** δ 8.34 (bs, 1H), 7.30 (d, 1H, J = 7.9 Hz), 7.25 (t, 1H, J = 2.8 Hz), 6.86 (d, 1H, J = 7.9 Hz), 6.70 (t, 1H, J = 2.3 Hz), 2.93 (tt, 1H, J<sub>1</sub> = 11.7 Hz, J<sub>2</sub> = 3.1 Hz), 1.99 (d, 2H, J = 12.8 Hz), 1.90 (d, 1H, J = 12.8 Hz), 1.81 (d, 1H, J = 13.0 Hz), 1.60 - 1.43 (m, 4H), 1.35 - 1.29 (m, 1H);

**<sup>13</sup>C NMR (126 MHz, CDCl<sub>3</sub>)** δ 140.02 (s), 134.45 (s), 130.04 (s), 127.91 (s), 124.57 (s), 124.01 (s), 117.56 (s), 102.43 (s), 41.73 (s), 33.77 (s), 27.21 (s), 26.52 (s);  
**MS (EI):** 277.07 (M<sup>+</sup>).

#### 4-cyclopentyl-1H-indole (3q)

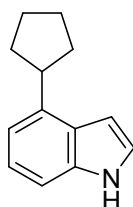

Chemical Formula: C<sub>13</sub>H<sub>15</sub>N  
Calculated Exact Mass: 185.12

**<sup>1</sup>H NMR (500 MHz, CDCl<sub>3</sub>)** δ 8.14 (bs, 1H), 7.25 (d, 1H, J = 8.2 Hz), 7.19 (t, 1H, J = 2.7 Hz), 7.14 (t, 1H, J = 7.4 Hz), 7.01 (d, 1H, J = 7.2 Hz), 6.63 (t, 1H, J = 2.1 Hz); 3.48 - 3.41 (m, 1H), 2.15 - 2.12 (m, 2H), 1.87 - 1.71 (m, 6H);

**<sup>13</sup>C NMR (126 MHz, CDCl<sub>3</sub>)** δ 138.74 (s), 135.86 (s), 127.05 (s), 123.29 (s), 122.17 (s), 116.27 (s), 108.75 (s), 101.49 (s), 43.53 (s), 33.47 (s), 25.75 (s);  
**MS (EI):** 185.19 (M<sup>+</sup>).

#### 5-chloro-4-cyclopentyl-1H-indole (3r)

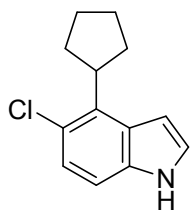

Chemical Formula: C<sub>13</sub>H<sub>14</sub>ClN  
Calculated Exact Mass: 219.08

**<sup>1</sup>H NMR (500 MHz, CDCl<sub>3</sub>)** δ 8.10 (bs, 1H), 7.14 - 7.08 (m, 3H), 6.57 - 6.06 (m, 1H), 3.87 - 3.80 (m, 1H), 2.06 - 1.89 (m, 6H), 1.75 - 1.72 (m, 2H);

**<sup>13</sup>C NMR (126 MHz, CDCl<sub>3</sub>)** δ 135.06 (d, J = 16.4 Hz), 126.87 (s), 124.71 (s), 124.14 (d, J = 46.6 Hz), 109.97 (s), 102.36 (s), 41.83 (s), 31.93 (s), 27.12 (s);

**MS (EI):** 219.14 (M<sup>+</sup>).

#### 4-(hexan-3-yl)-1H-indole-5-carbonitrile (3s)

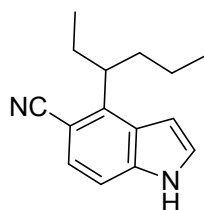

Chemical Formula: C<sub>15</sub>H<sub>18</sub>N<sub>2</sub>  
Calculated Exact Mass: 226.15

**<sup>1</sup>H NMR (500 MHz, CDCl<sub>3</sub>)** δ 8.48 (bs, 1H), 7.39 (d, 1H, J = 8.4 Hz) , 7.31-7.28(m, 2H), 6.78-6.76 (m, 1H), 3.57-3.50(m, 1H), 2.04-1.98 (m, 1H), 1.88 - 1.81 (m, 1H), 1.52 (d, 2H, J =7.1 Hz), 1.34 - 1.25 (m, 3H), 1.08 - 1.02 (m, 1H), 0.89 - 0.78 (m, 4H);

**<sup>13</sup>C NMR (126 MHz, CDCl<sub>3</sub>)** δ 145.87 (s), 137.89 (s), 126.22 (s), 125.72 (s), 124.95 (s), 120.57 (s), 110.04 (s), 103.22 (s), 38.98 (s), 36.25 (s), 30.35 (s), 22.72 (s), 20.66 (s), 13.98(s);

**MS (EI):** 226.20 (M<sup>+</sup>).

#### 4-cycloheptyl-1H-indole (3t)

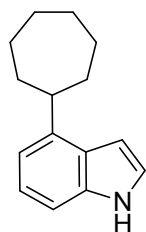

Chemical Formula: C<sub>15</sub>H<sub>19</sub>N  
Calculated Exact Mass: 213.15

**<sup>1</sup>H NMR (500 MHz, CDCl<sub>3</sub>)** δ 8.14 (bs, 1H), 7.23 (d, 1H, J = 8.1 Hz) , 7.18 (t, 1H, J = 2.8 Hz), 7.14 (t, 1H, J = 7.4 Hz), 6.97 (d, 1H, J = 7.2 Hz), 6.61 (t, 1H, J = 2.1 Hz); 3.12 (tt, 1H, J1 = 10.4 Hz, J2 = 3.5 Hz), 2.07 - 2.02 (m, 2H), 1.87 - 1.73 (m, 6H), 1.68 - 1.60 (m, 4H);

**<sup>13</sup>C NMR (126 MHz, CDCl<sub>3</sub>)** δ 141.95 (s), 135.77 (s), 126.22 (s), 123.40 (s), 122.37 (s), 116.30 (s), 108.61 (s), 101.30 (s), 44.24 (s), 35.89 (s), 28.22 (s), 27.77 (s);  
**MS (EI):** 213.22 (M<sup>+</sup>).

**5-chloro-4-cycloheptyl-1H-indole (3u)**

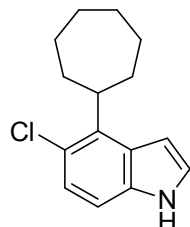

Chemical Formula: C<sub>15</sub>H<sub>18</sub>ClN  
Calculated Exact Mass: 247.11

**<sup>1</sup>H NMR (500 MHz, CDCl<sub>3</sub>)** δ 8.14 (bs, 1H), 7.18 (t, 1H, J = 2.7 Hz), 7.17 (d, 1H, J = 8.5 Hz), 7.13 (d, 1H, J = 8.5 Hz), 6.68 (s, 1H), 3.63 (s, 1H), 2.13 (s, 2H), 1.90 - 1.77 (m, 6H), 1.70 - 1.64 (m, 4H);

**<sup>13</sup>C NMR (126 MHz, CDCl<sub>3</sub>)** δ 138.20 (s), 135.03 (s), 123.96 (s), 123.34 (s), 109.69 (s), 103.17 (s), 43.28 (s), 33.59 (s), 28.65(s), 28.16 (s);  
**MS (EI):** 247.18 (M<sup>+</sup>).

**5-chloro-4-cyclooctyl-1H-indole (3v)**

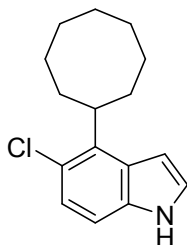

Chemical Formula: C<sub>16</sub>H<sub>20</sub>ClN  
Calculated Exact Mass: 261.13

**<sup>1</sup>H NMR (500 MHz, CDCl<sub>3</sub>)** δ 8.15 (bs, 1H), 7.19 - 7.11 (m, 3H), 6.61(s, 1H), 3.80 (s, 1H), 2.11 (s, 2H), 1.87 - 1.62 (m, 12H);

**<sup>13</sup>C NMR (126 MHz, CDCl<sub>3</sub>)** δ 139.50 (s), 135.20 (s), 126.57 (s), 124.01 (d, J = 86.9 Hz), 109.71(s), 103.43 (s), 40.34 (s), 33.79 (s), 29.82 (s), 27.10 (s), 26.53 (s);  
**MS (EI):** 261.16 (M<sup>+</sup>).

**4-cyclododecyl-1H-indole (3w)**

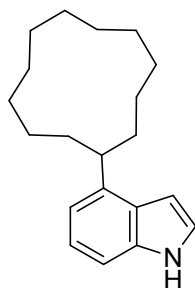

Chemical Formula: C<sub>20</sub>H<sub>29</sub>N  
Calculated Exact Mass: 283.23

**<sup>1</sup>H NMR (500 MHz, CDCl<sub>3</sub>)** δ 8.14 (bs, 1H), 7.25 (d, 1H, J = 8.1 Hz), 7.19 (t, 1H, J = 2.9 Hz), 7.15 (t, 1H, J = 7.6 Hz), 6.99 (d, 1H, J = 7.2 Hz), 6.65 (t, 1H, J = 2.0 Hz); 3.28 - 3.23(m, 1H), 1.95 - 1.90 (m, 2H), 1.70 - 1.62 (m, 2H), 1.48 - 1.26 (m, 18H);

**<sup>13</sup>C NMR (126 MHz, CDCl<sub>3</sub>)** δ 140.07 (s), 135.95 (s), 127.29 (s), 123.37 (s), 122.25 (s), 117.36 (s), 108.63 (s), 101.39 (s), 37.10 (s), 30.82 (s), 24.10 (s), 24.06 (s), 23.74 (s), 23.45(s), 23.18 (s);

**MS (EI):** 283.29 (M<sup>+</sup>).

#### 4-cyclododecyl-1H-indole-5-carbonitrile (3x)

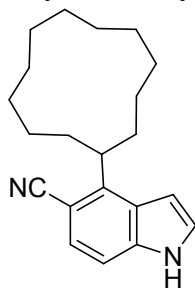

Chemical Formula: C<sub>21</sub>H<sub>28</sub>N<sub>2</sub>  
Calculated Exact Mass: 308.23

**<sup>1</sup>H NMR (500 MHz, CDCl<sub>3</sub>)** δ 8.59 (bs, 1H), 7.41 (d, 1H, J = 8.4 Hz), 7.34 - 7.29(m, 2H), 6.79 (t, 1H, J = 2.2 Hz), 3.63 - 3.60 (m, 1H), 2.25 - 2.19(m, 2H), 1.84 - 1.78 (m, 4H), 1.66 - 1.63 (m, 2H), 1.52 - 1.35 (m, 14H);

**<sup>13</sup>C NMR (126 MHz, CDCl<sub>3</sub>)** δ 146.17 (s), 138.06 (s), 126.00 (s), 124.99 (s), 120.81 (s), 110.21 (s), 103.62 (s), 38.33 (s), 30.63 (s), 24.54 (s), 24.44 (s), 23.92 (s), 22.89(s), 22.41 (s);

**MS (EI):** 308.21 (M<sup>+</sup>).

### 3. NMR Spectra

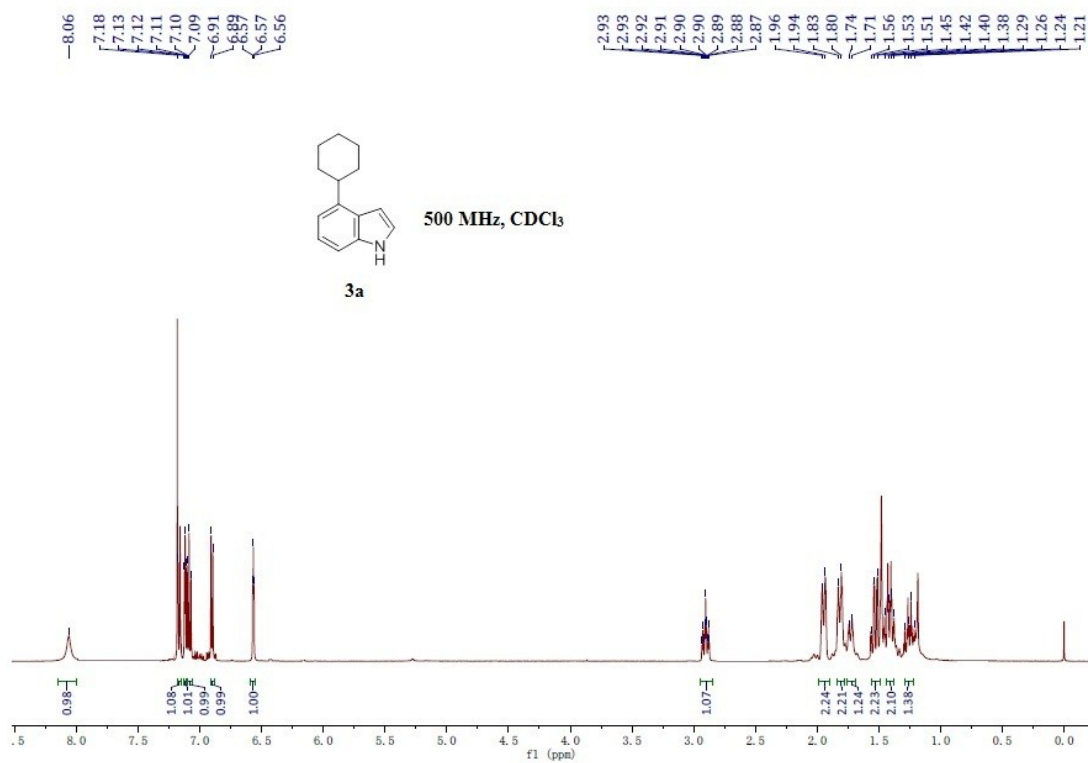

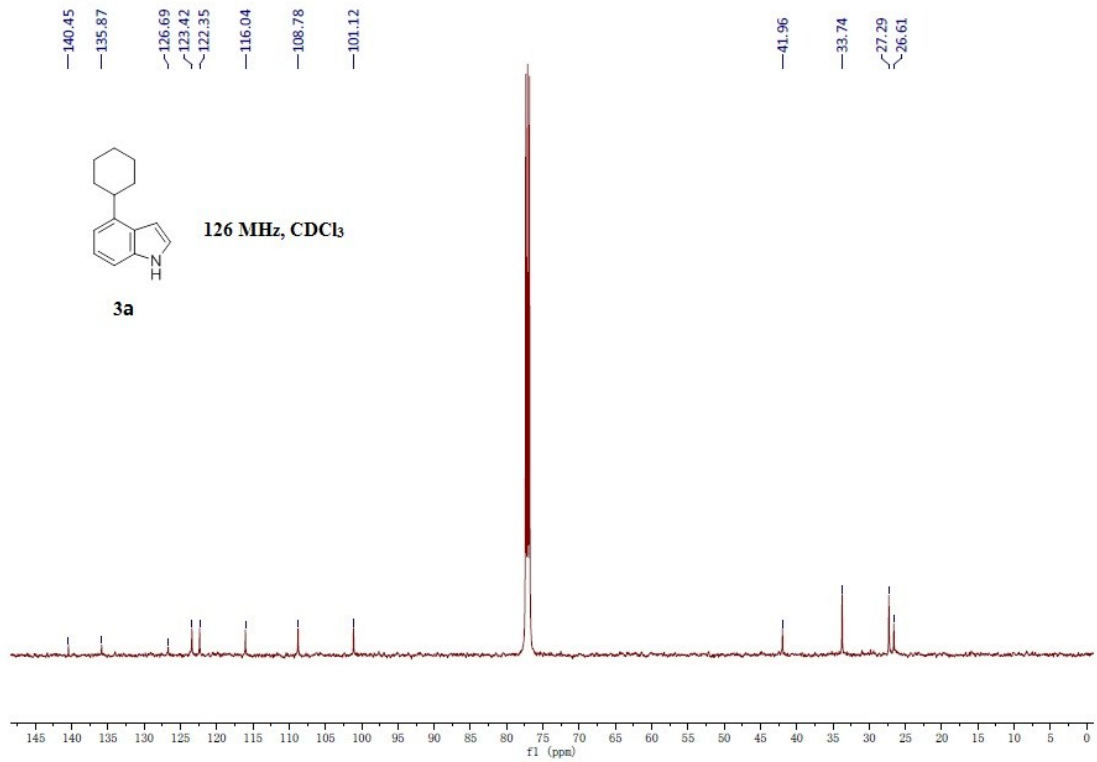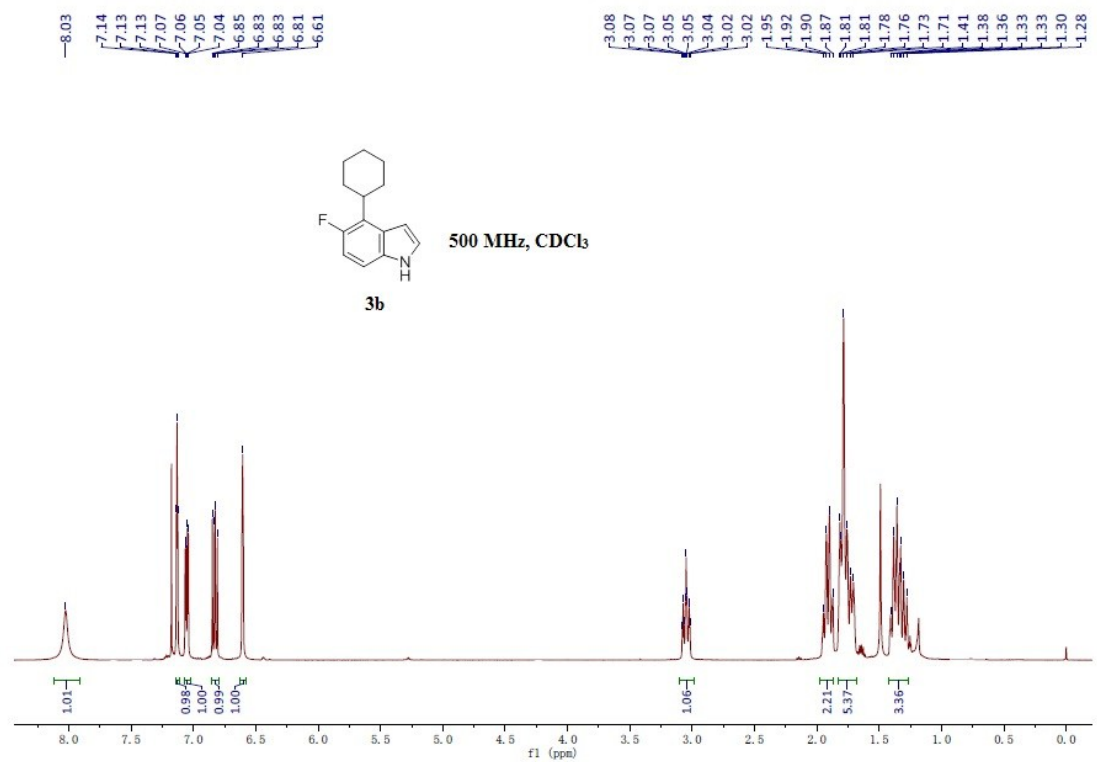

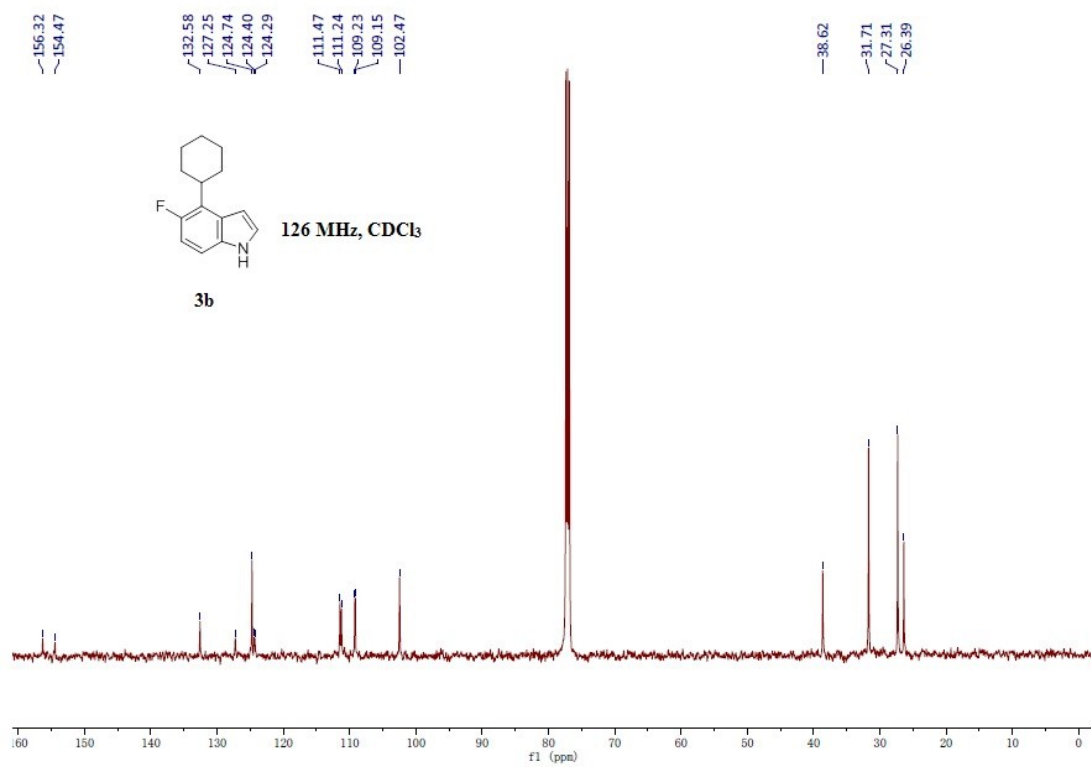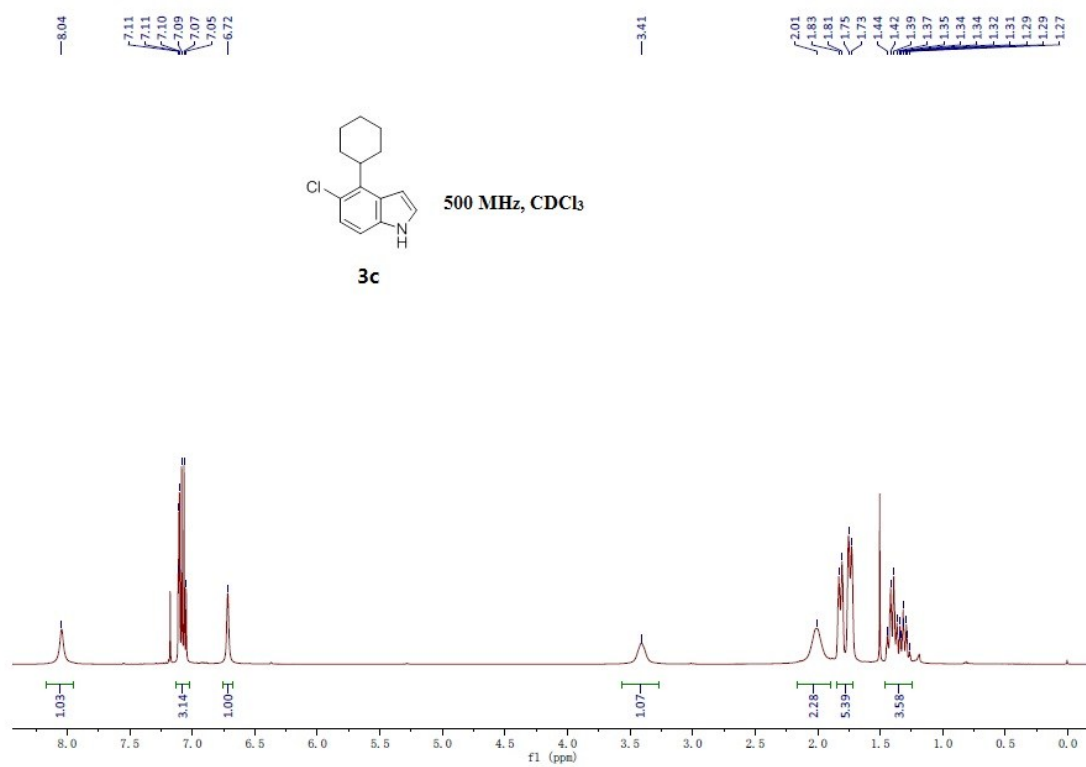

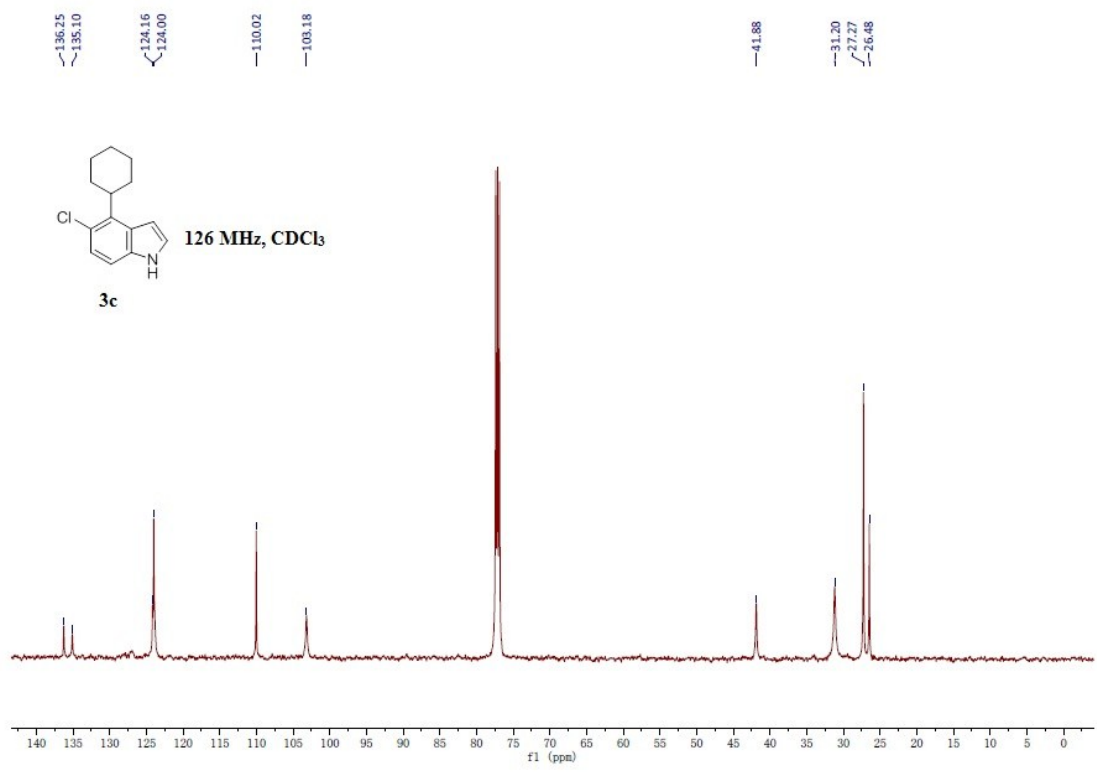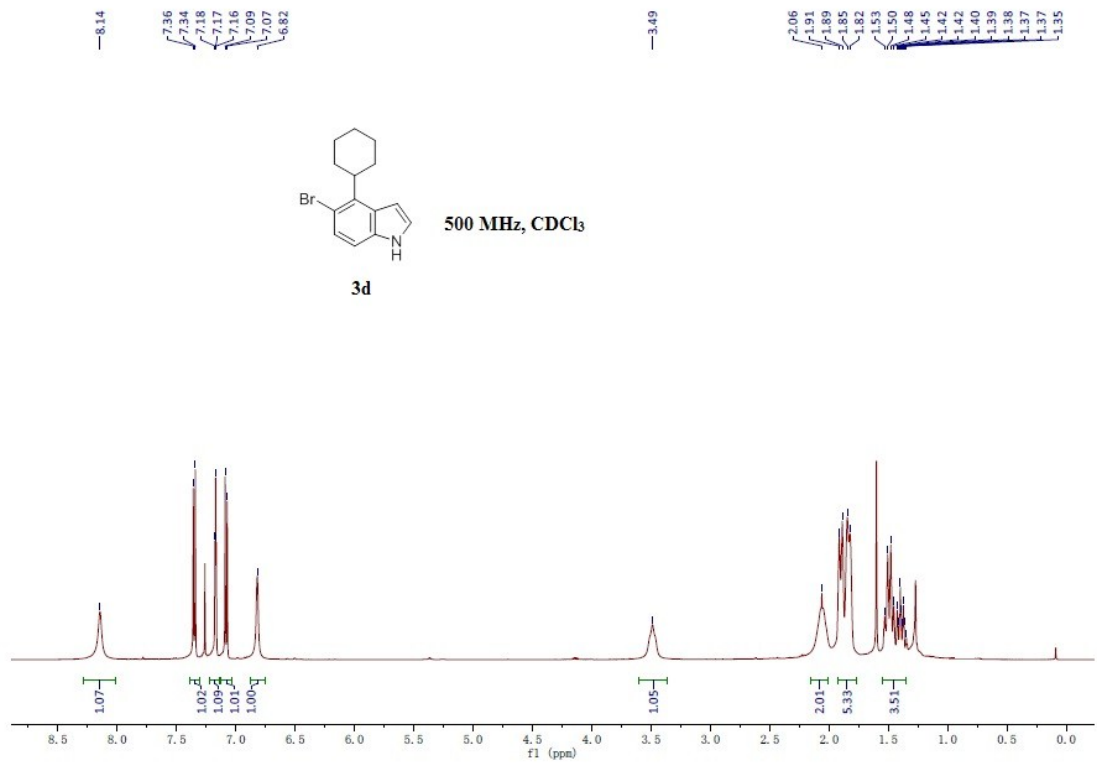



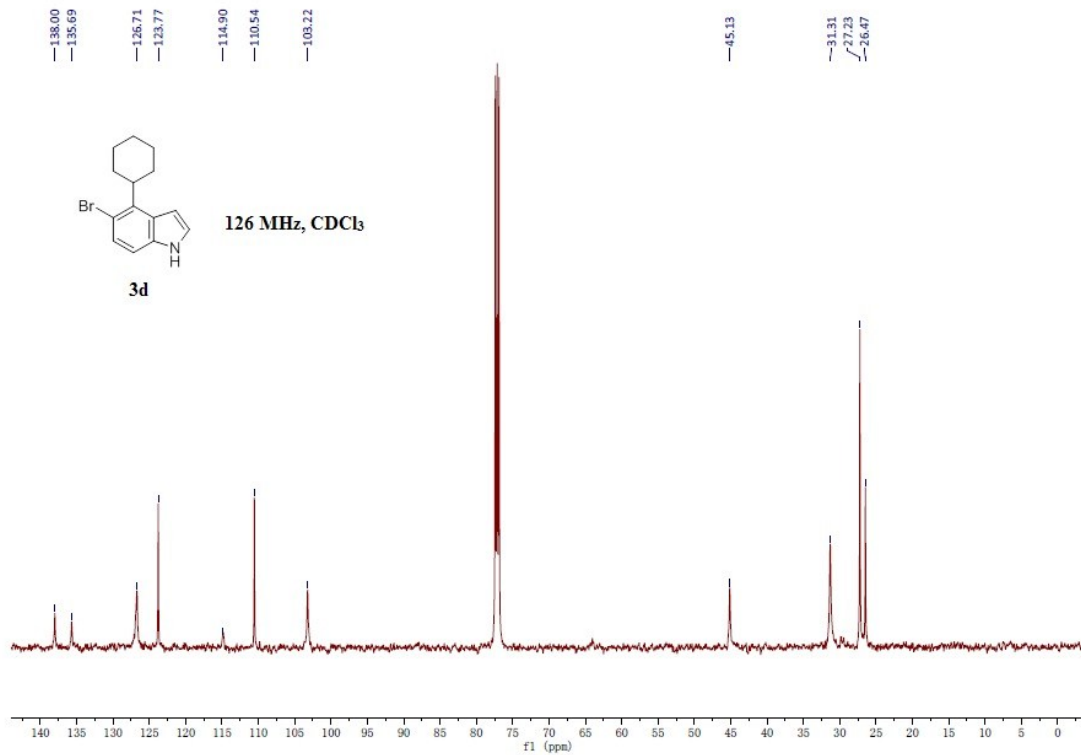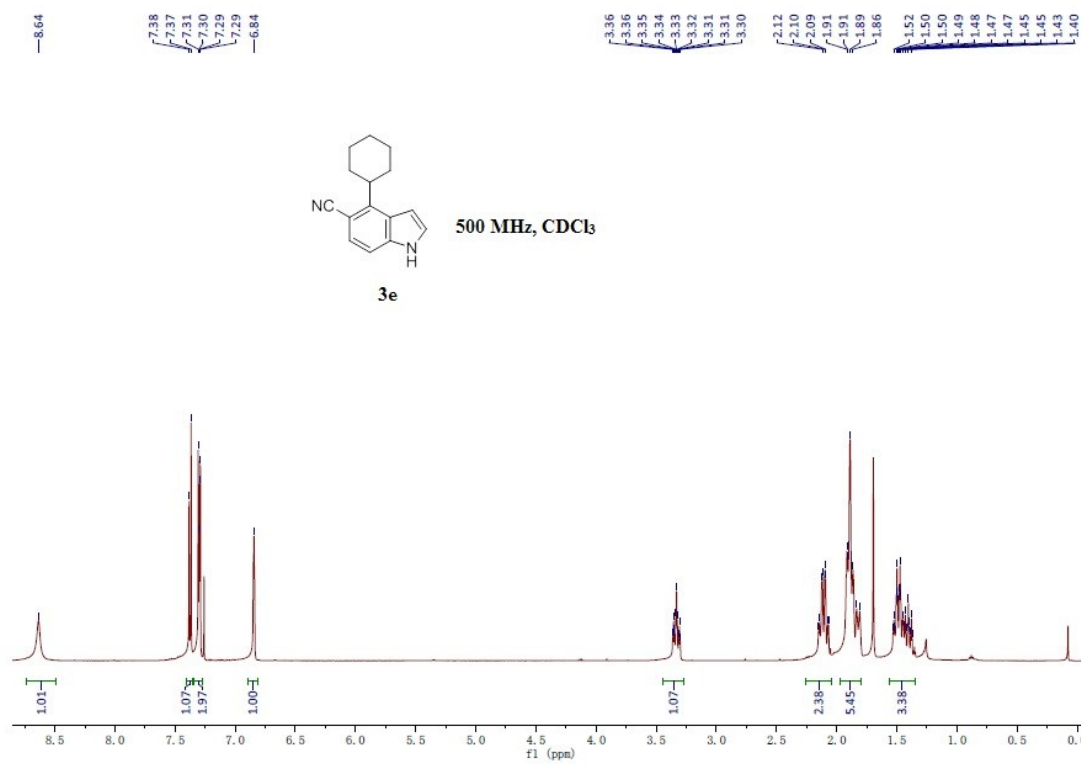

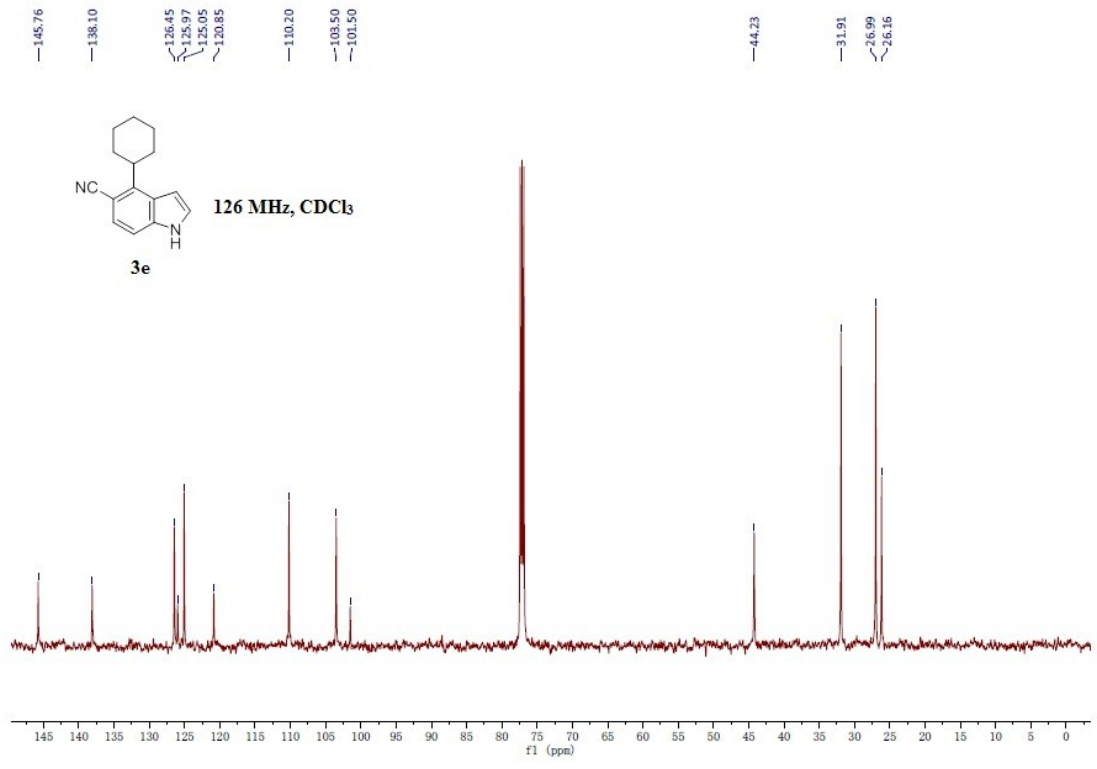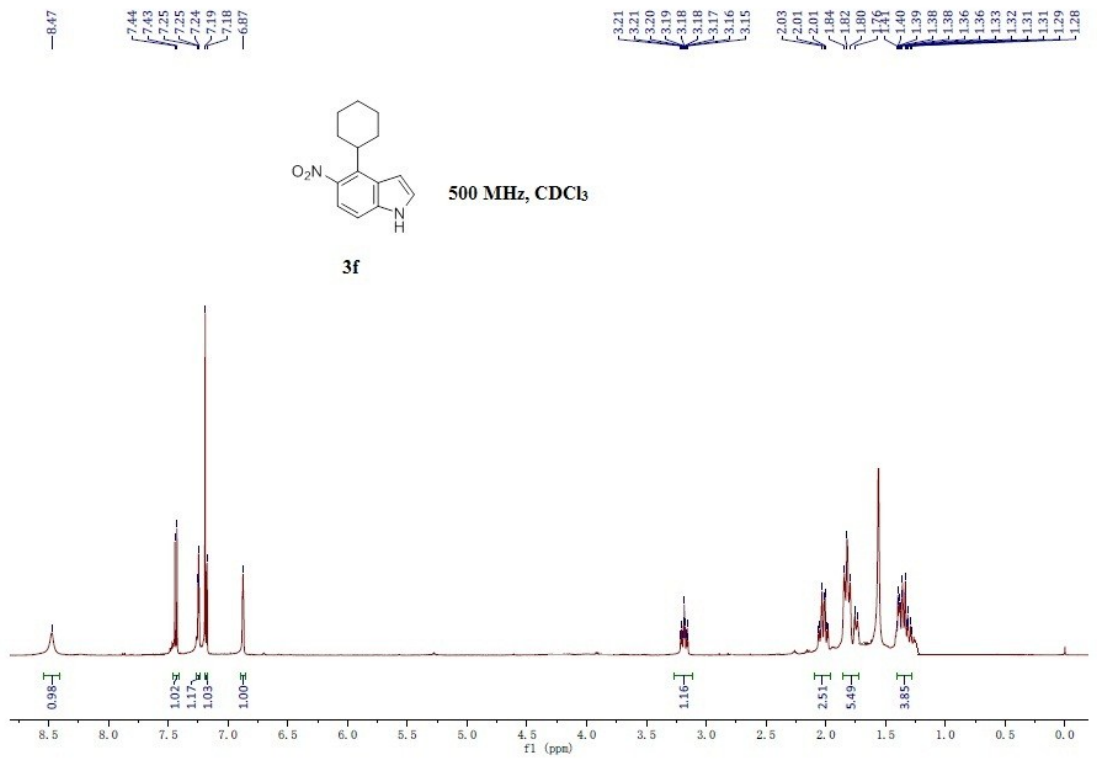

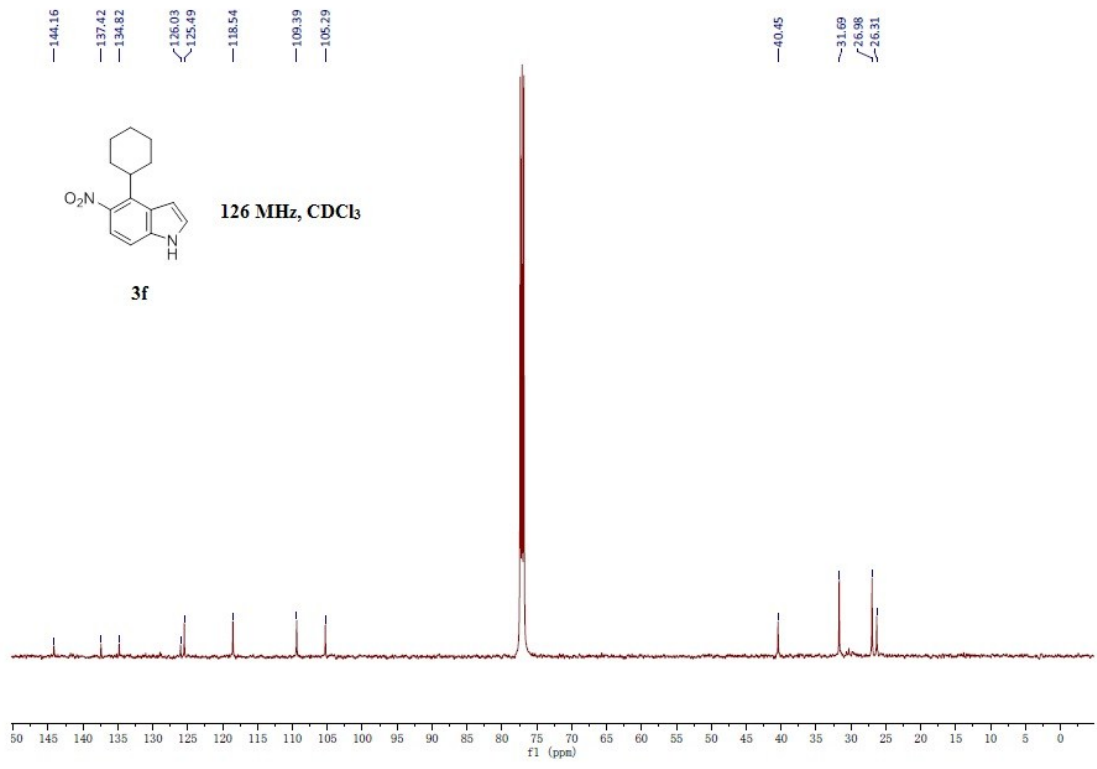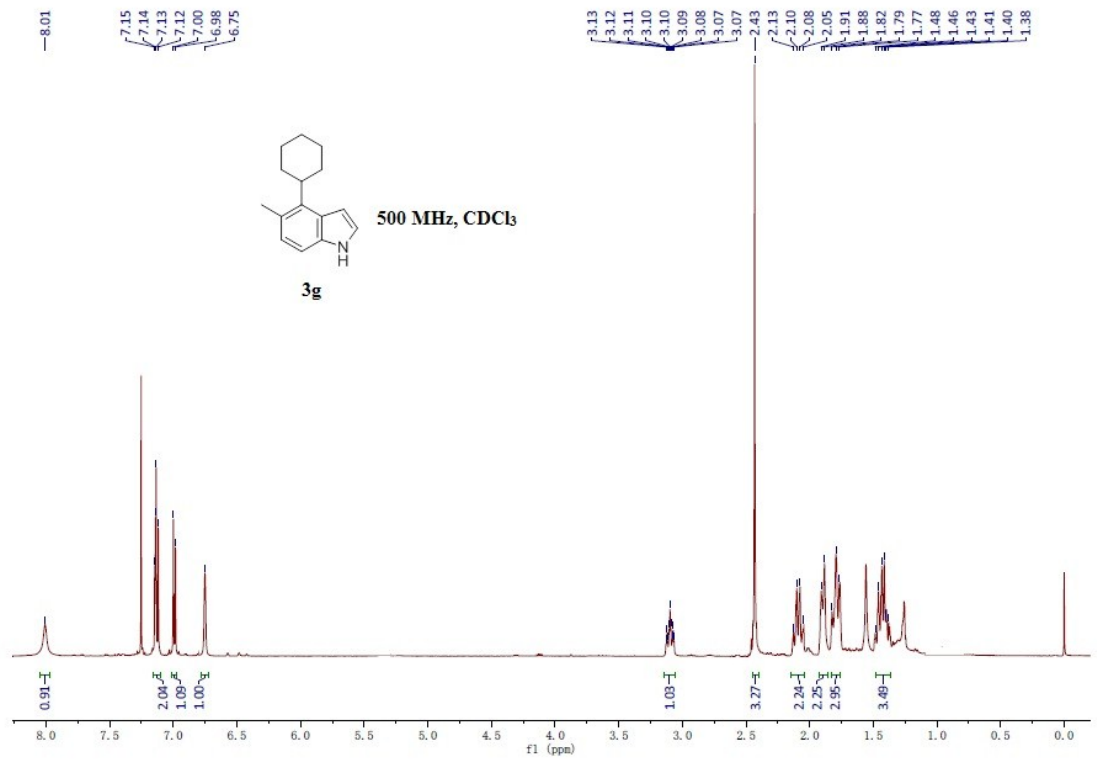

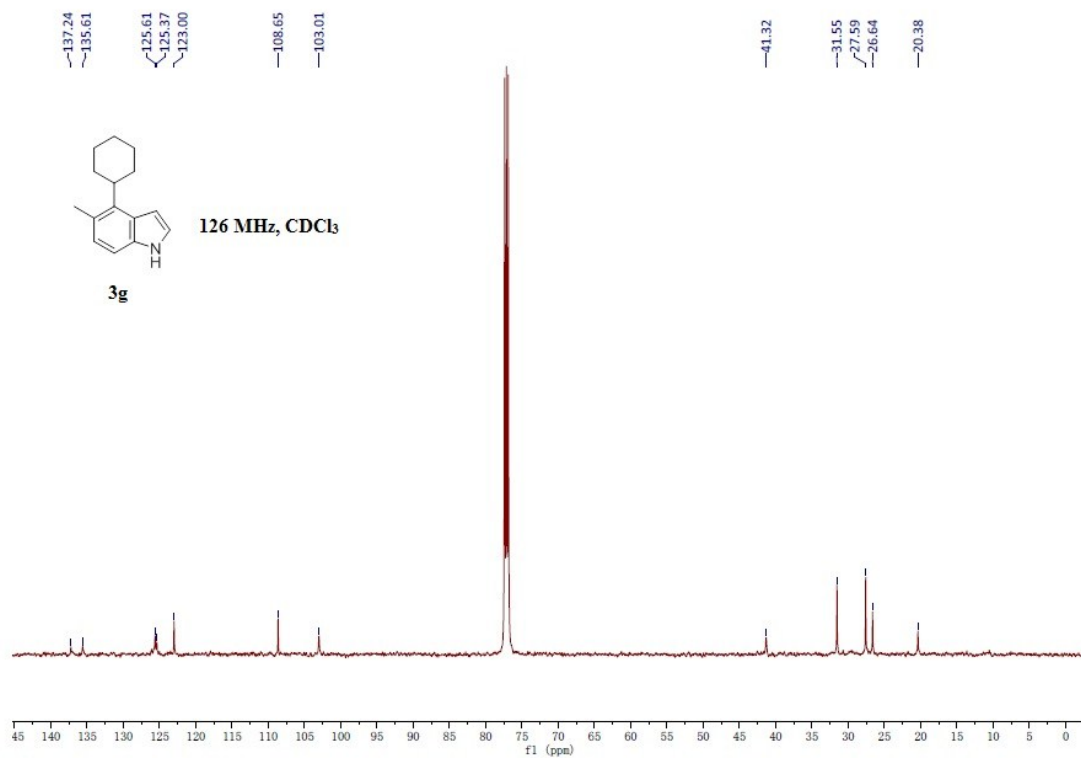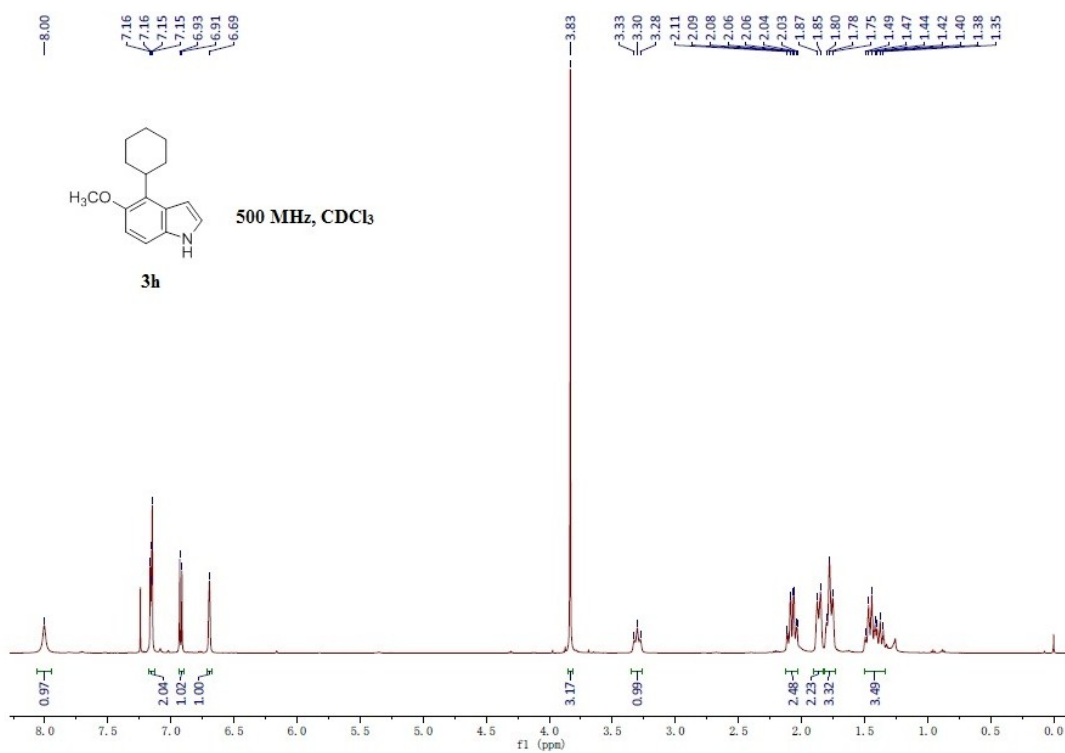

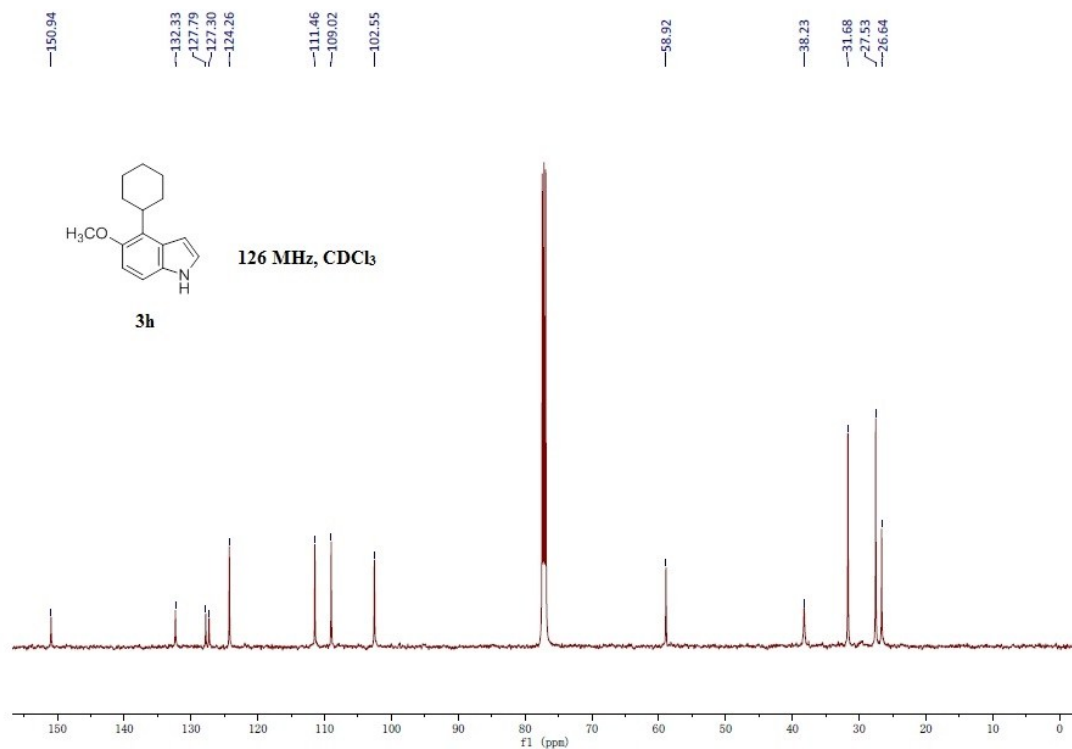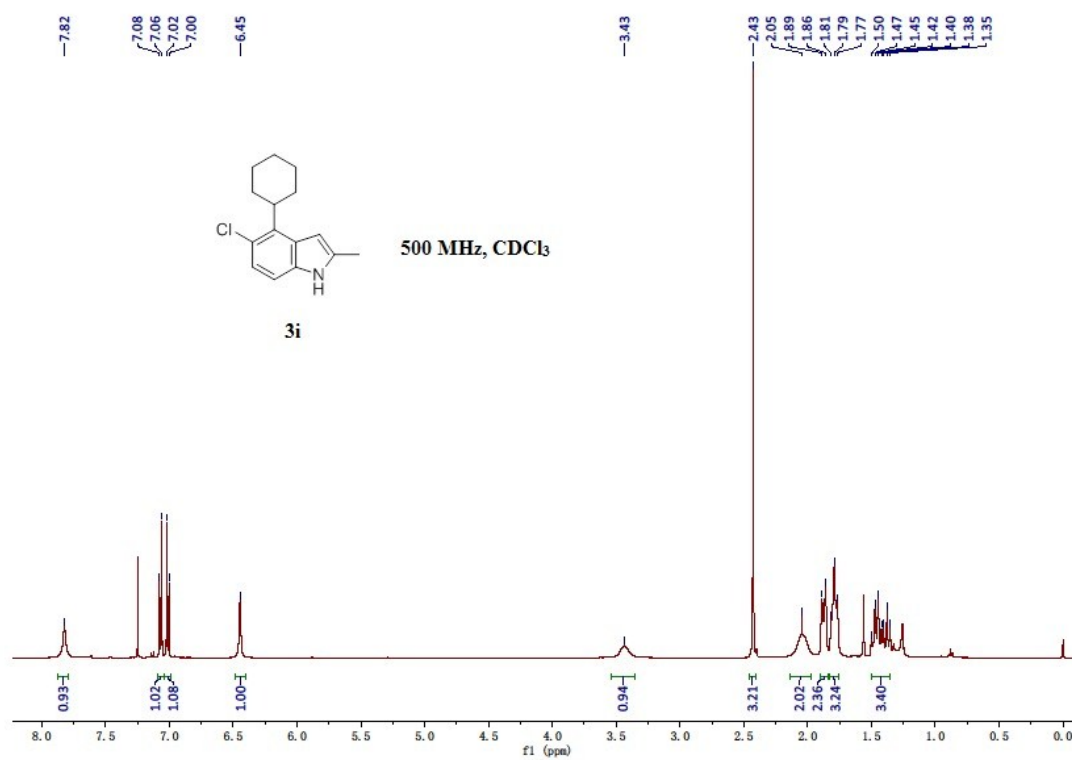

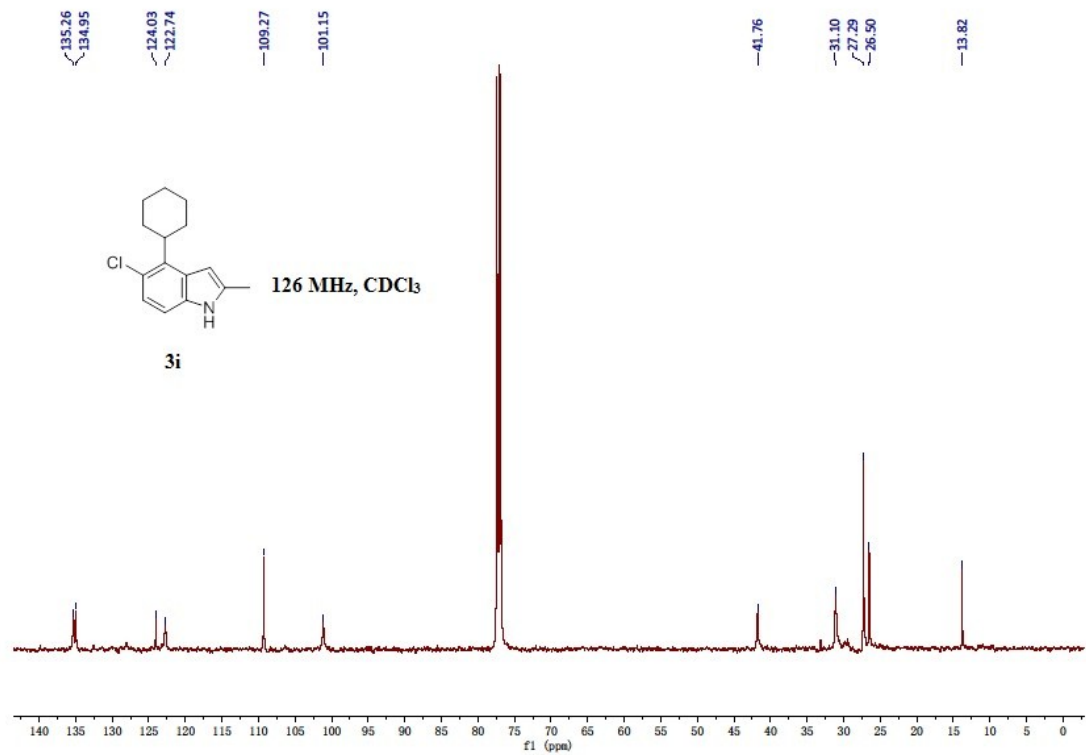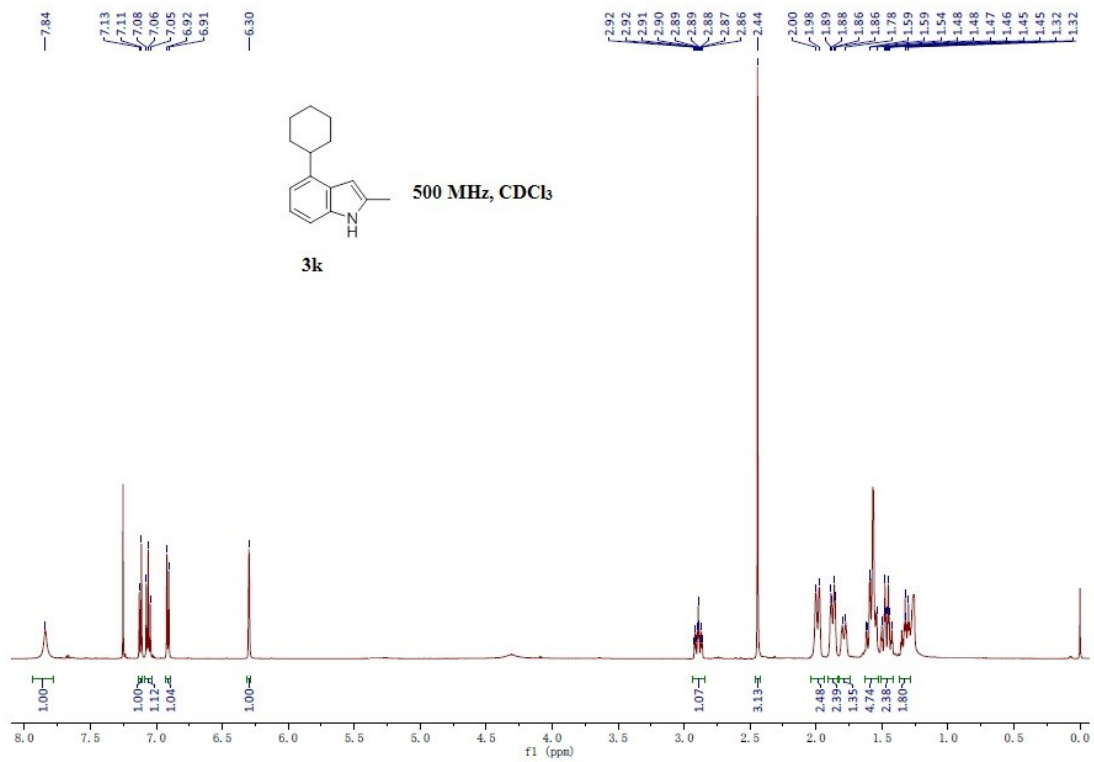

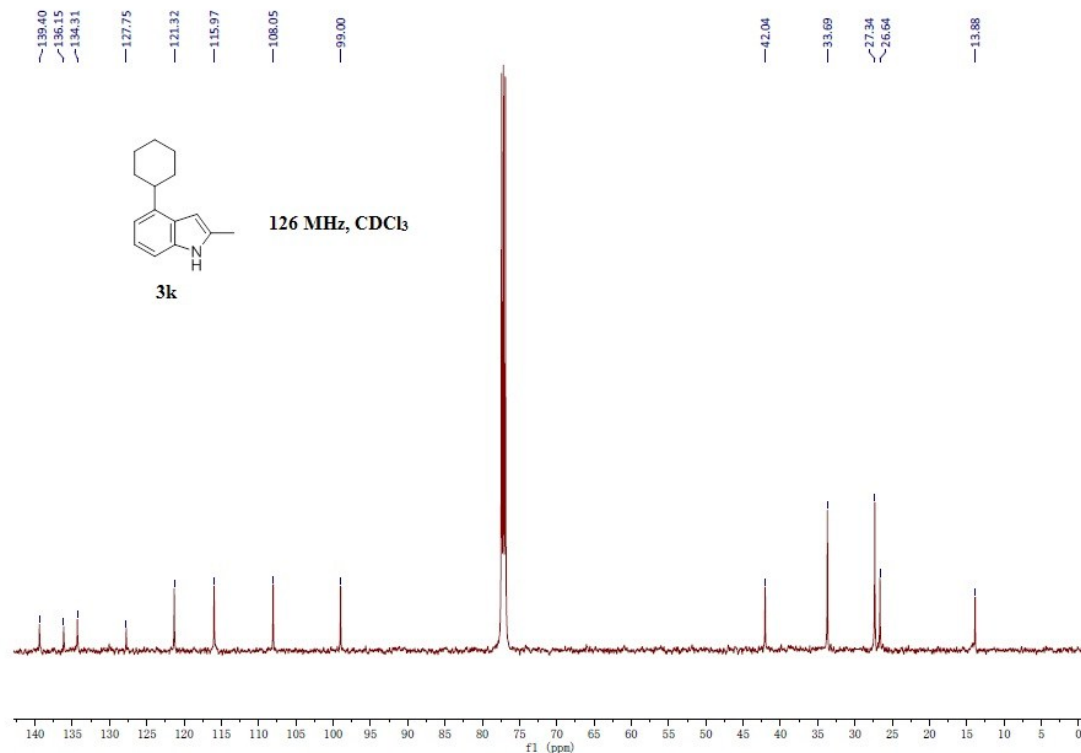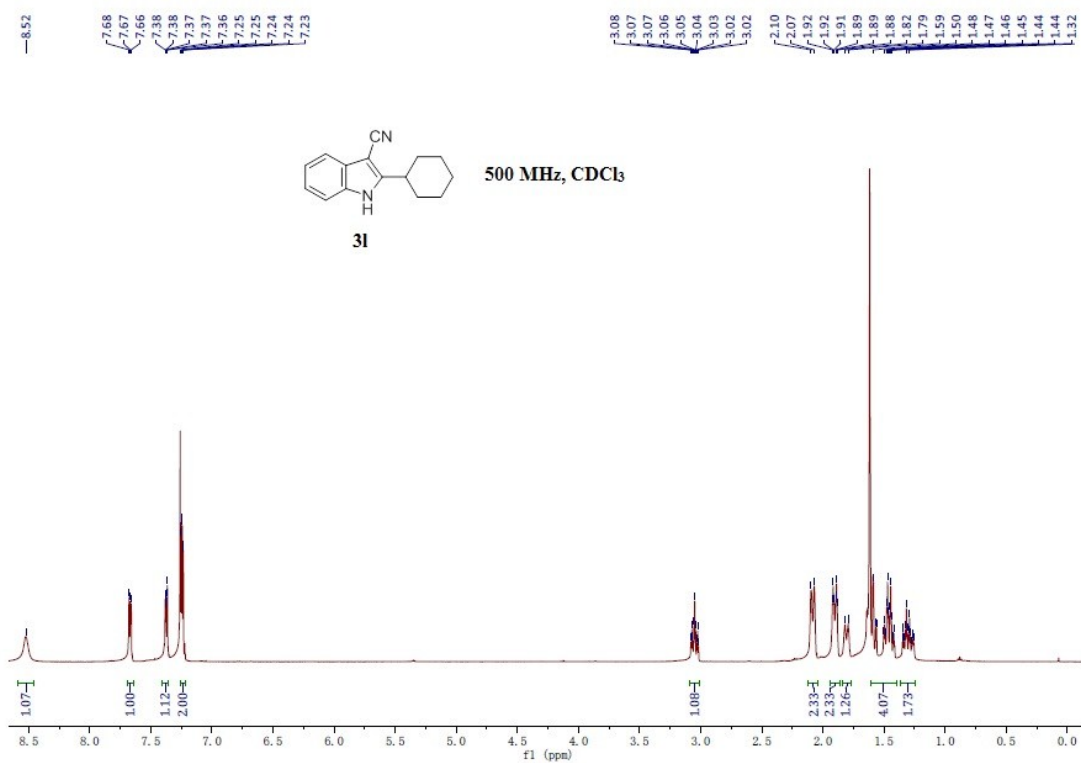

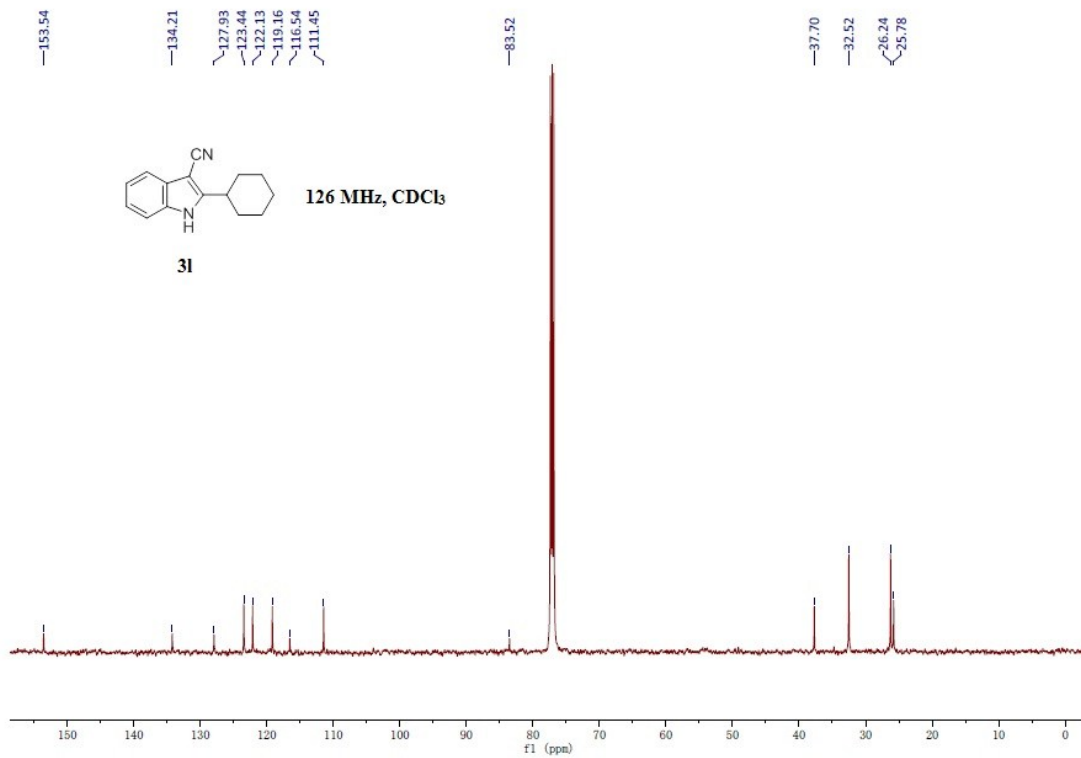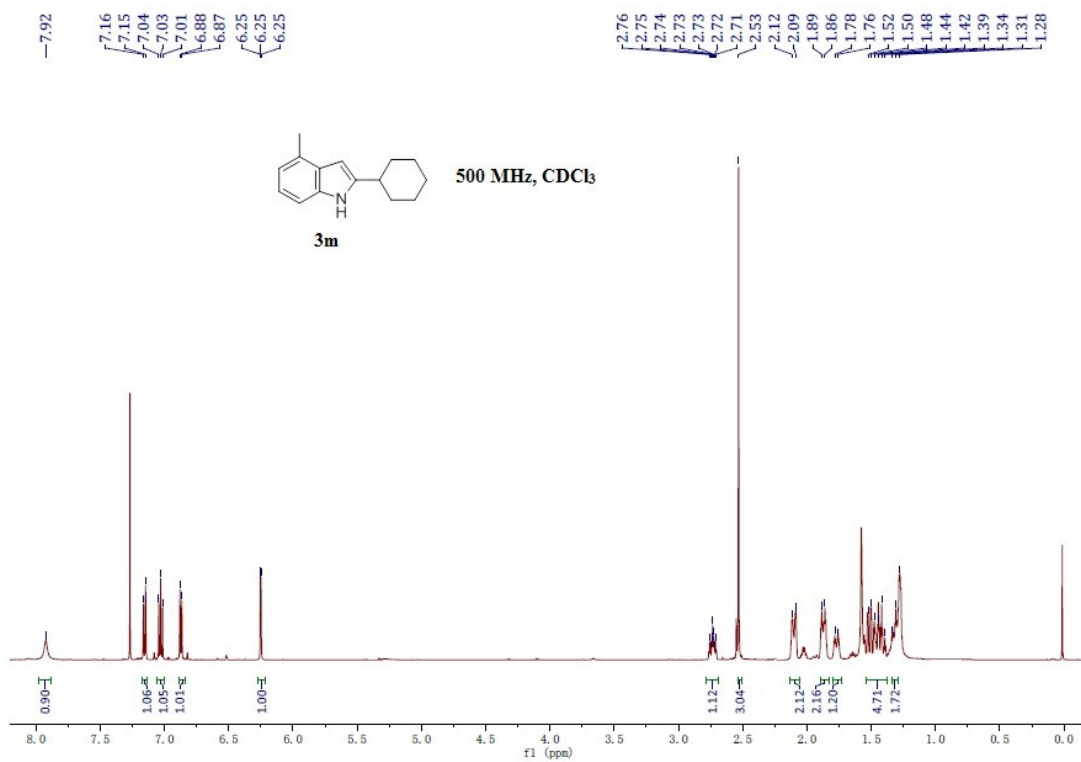



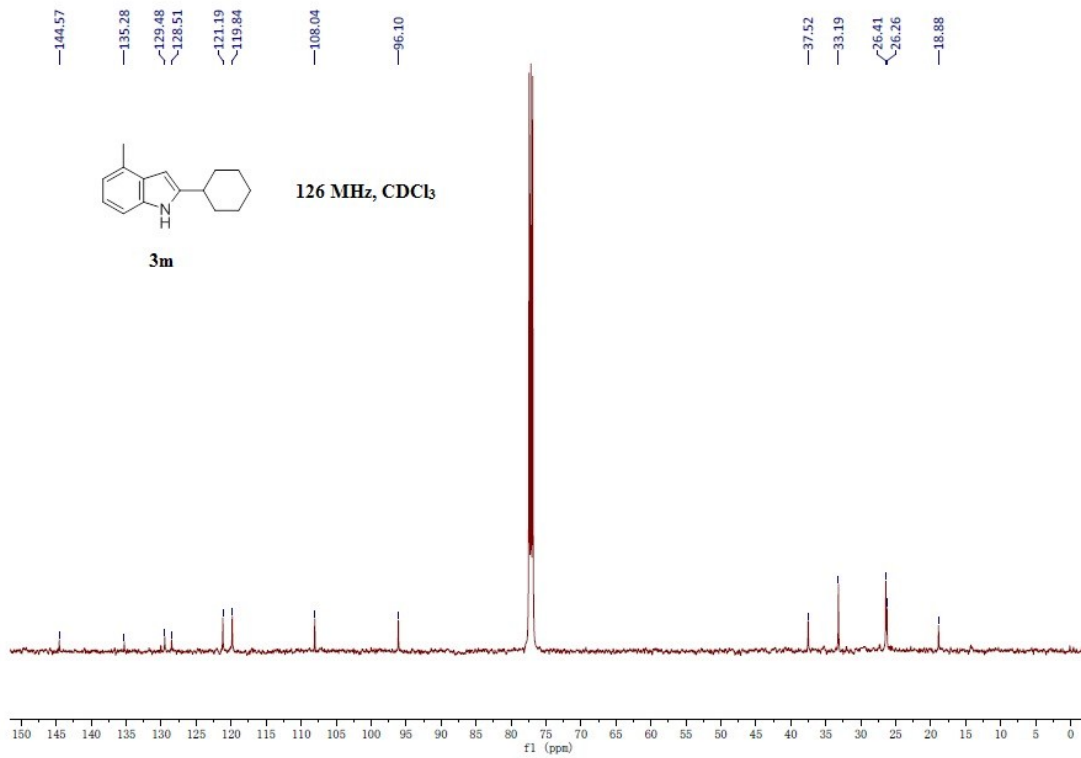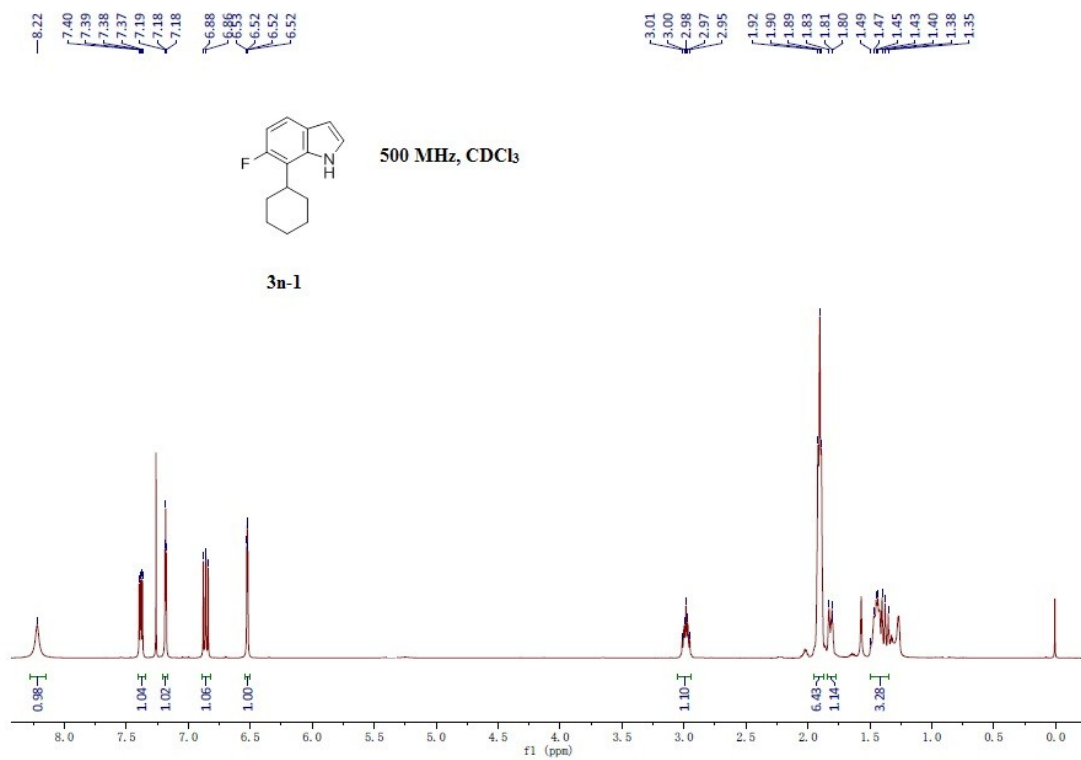

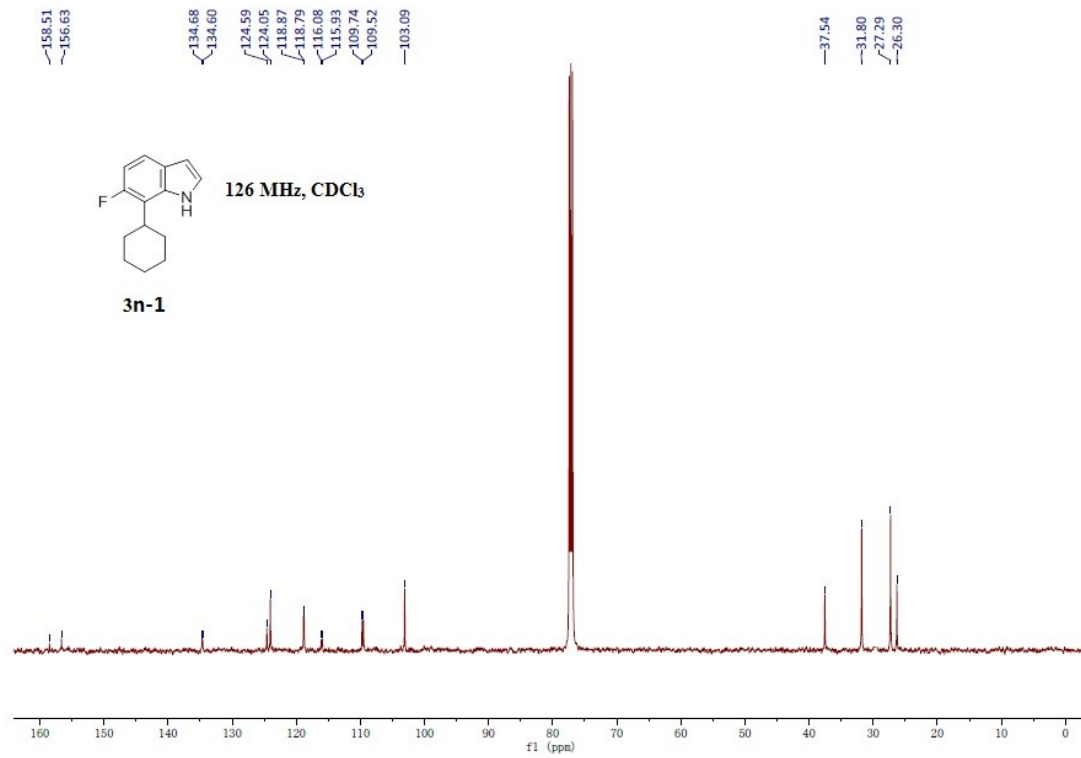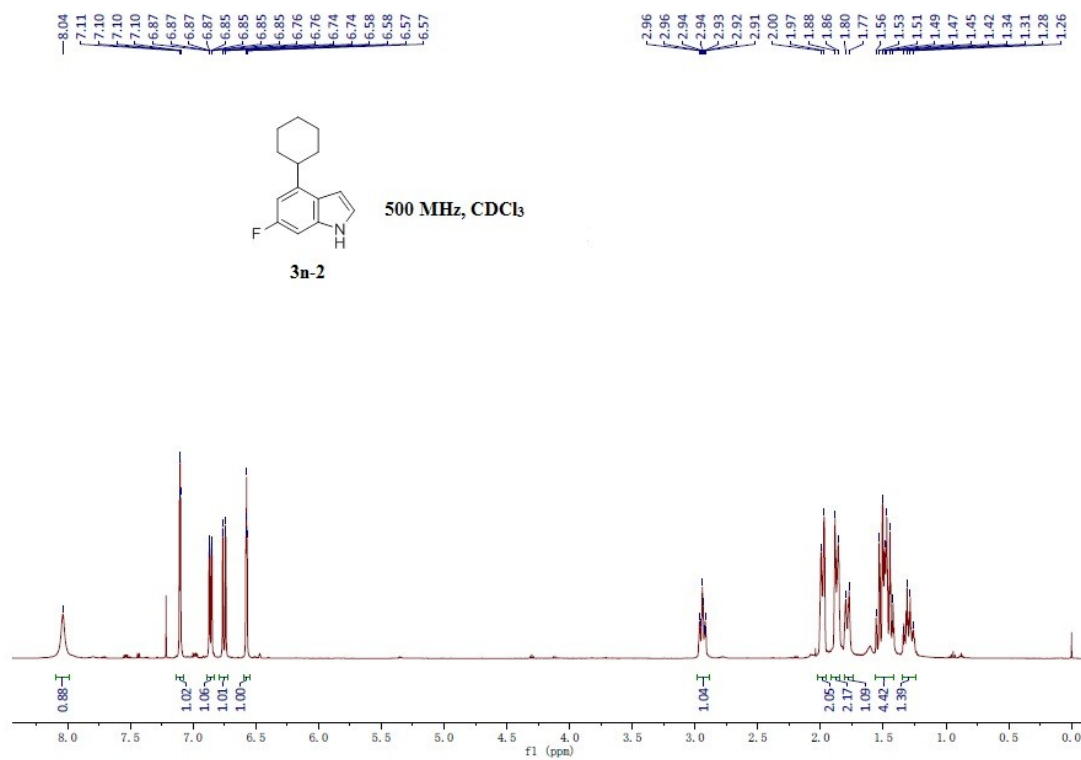

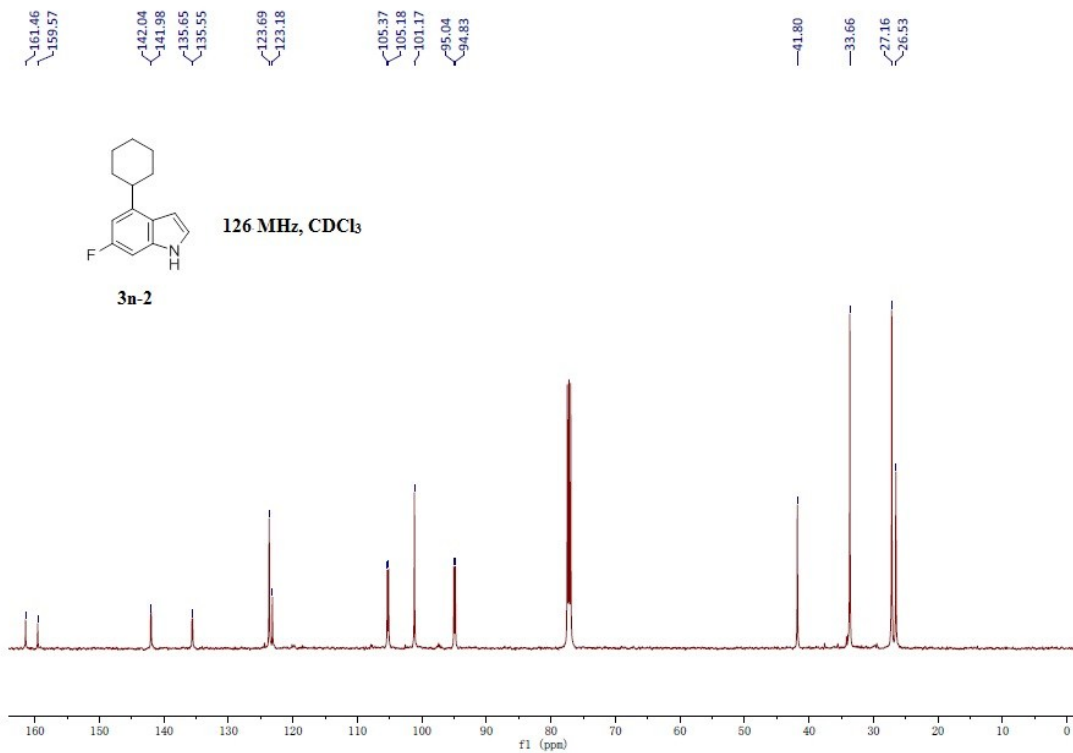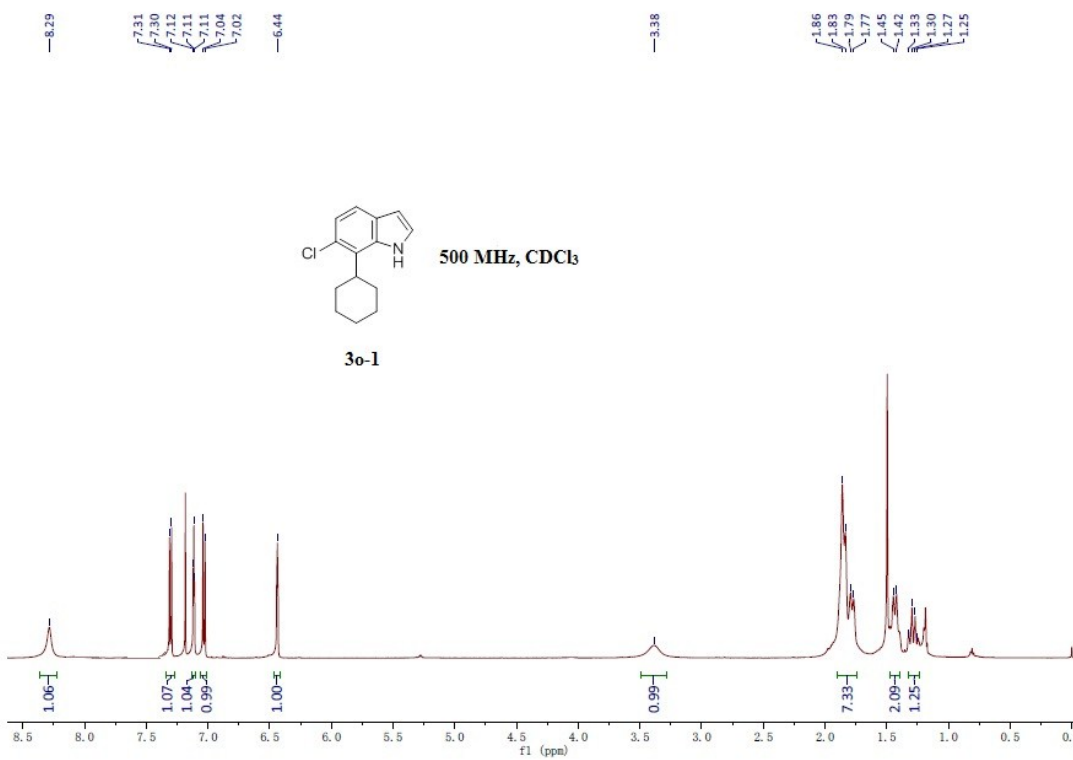

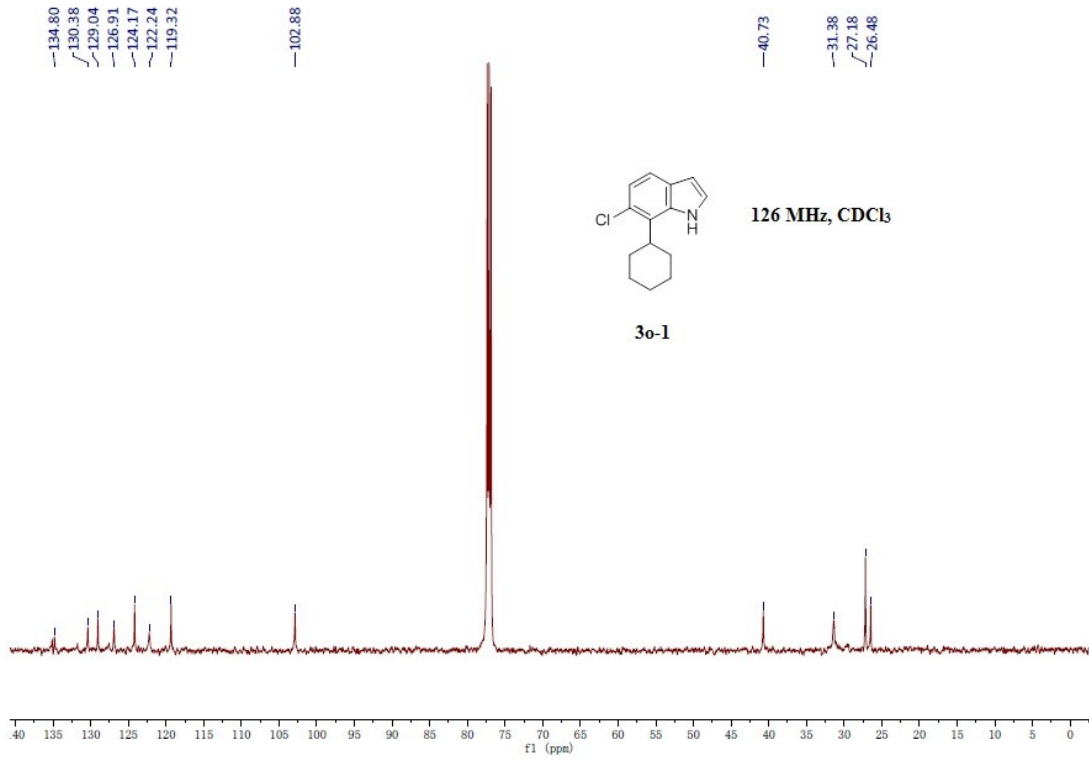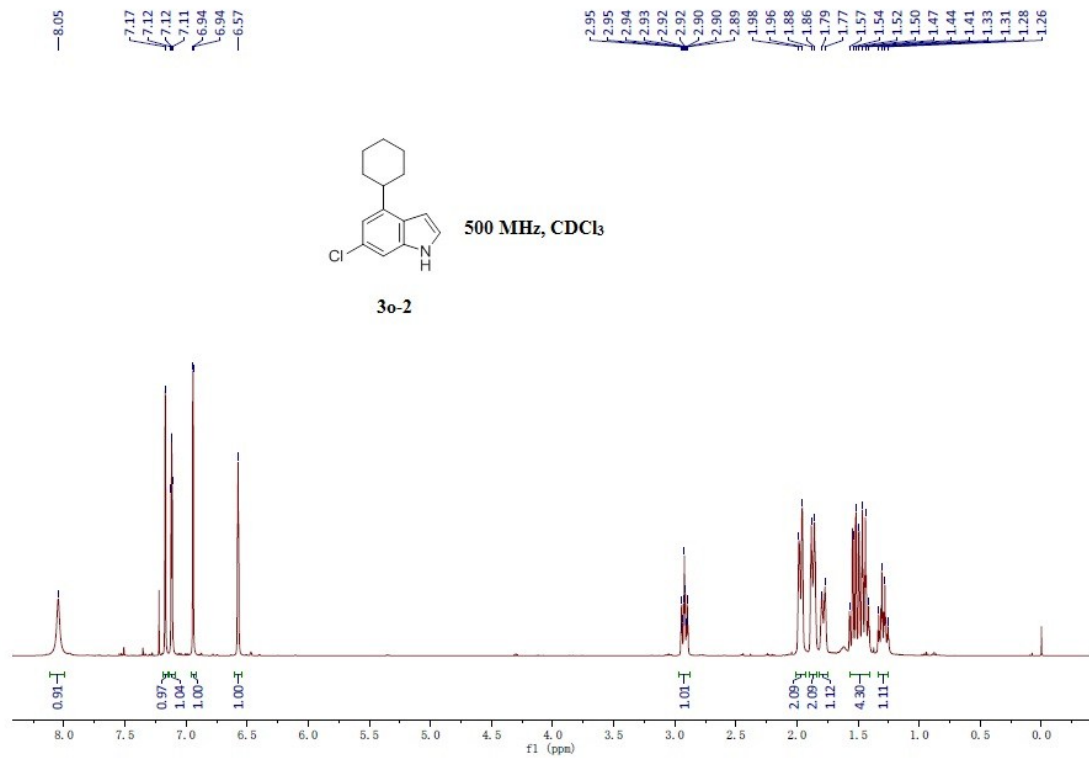

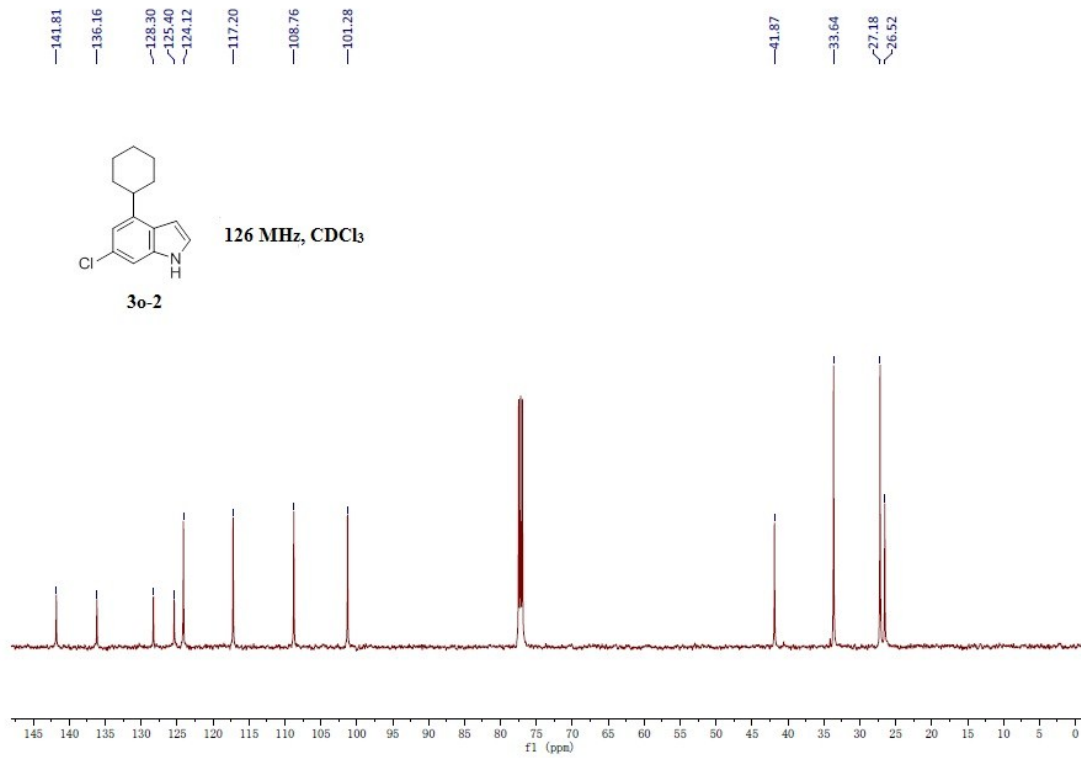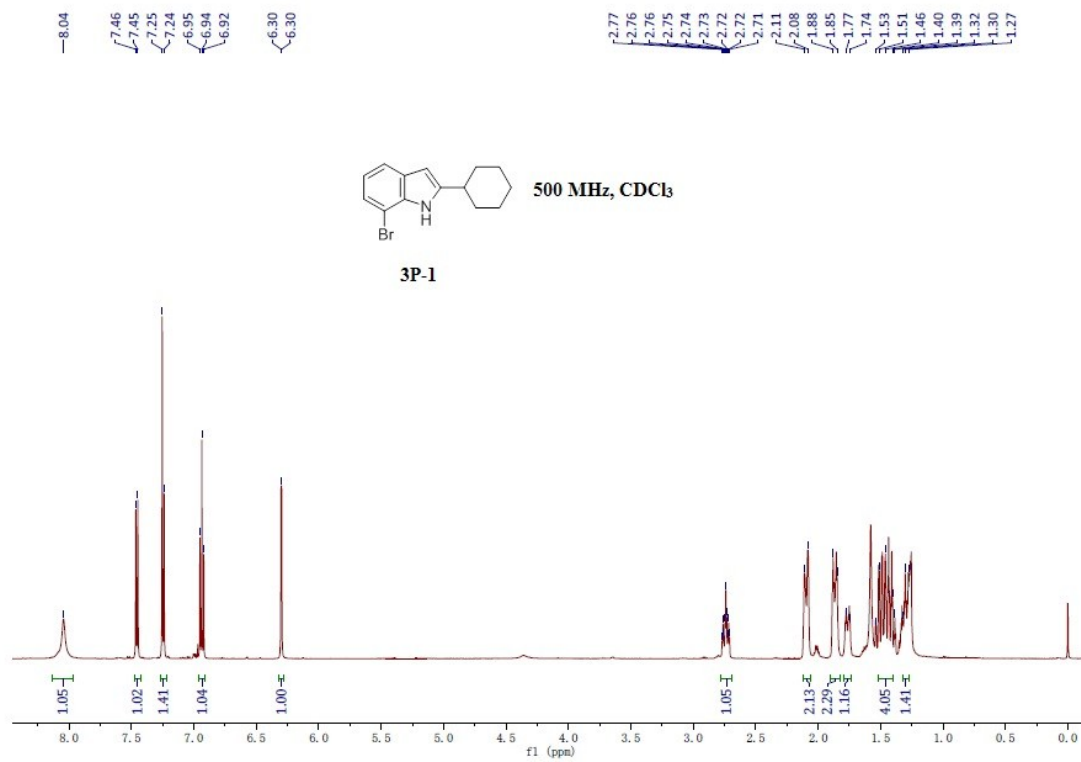

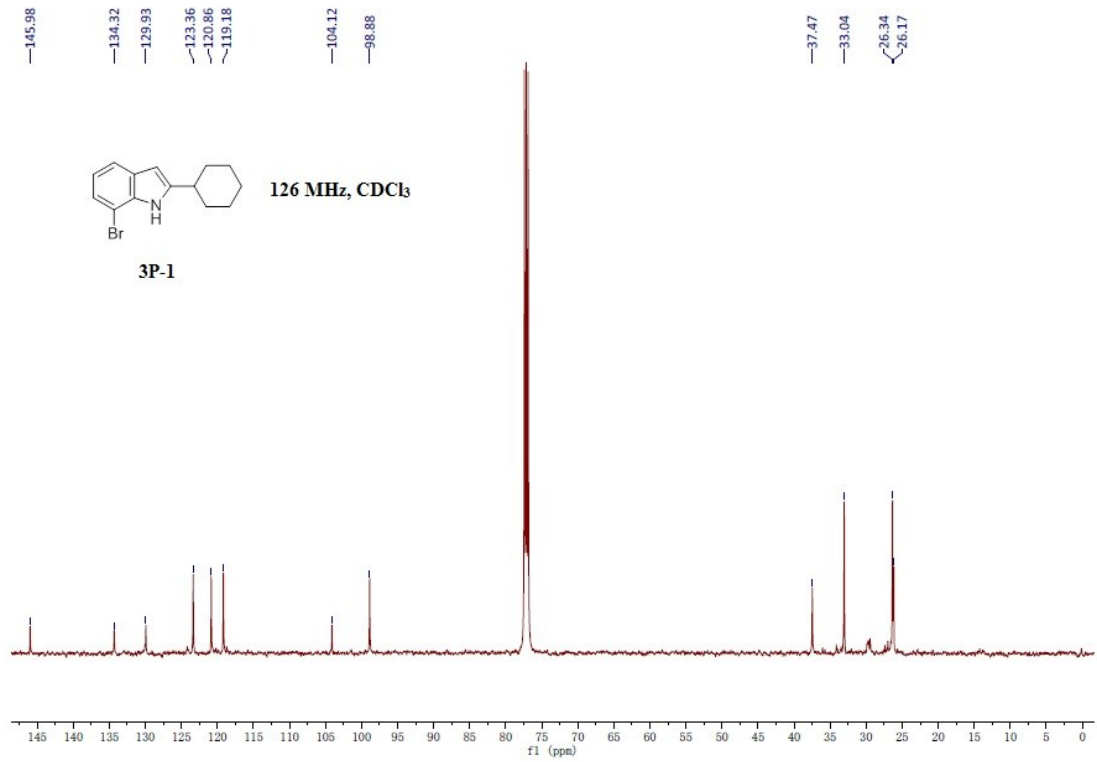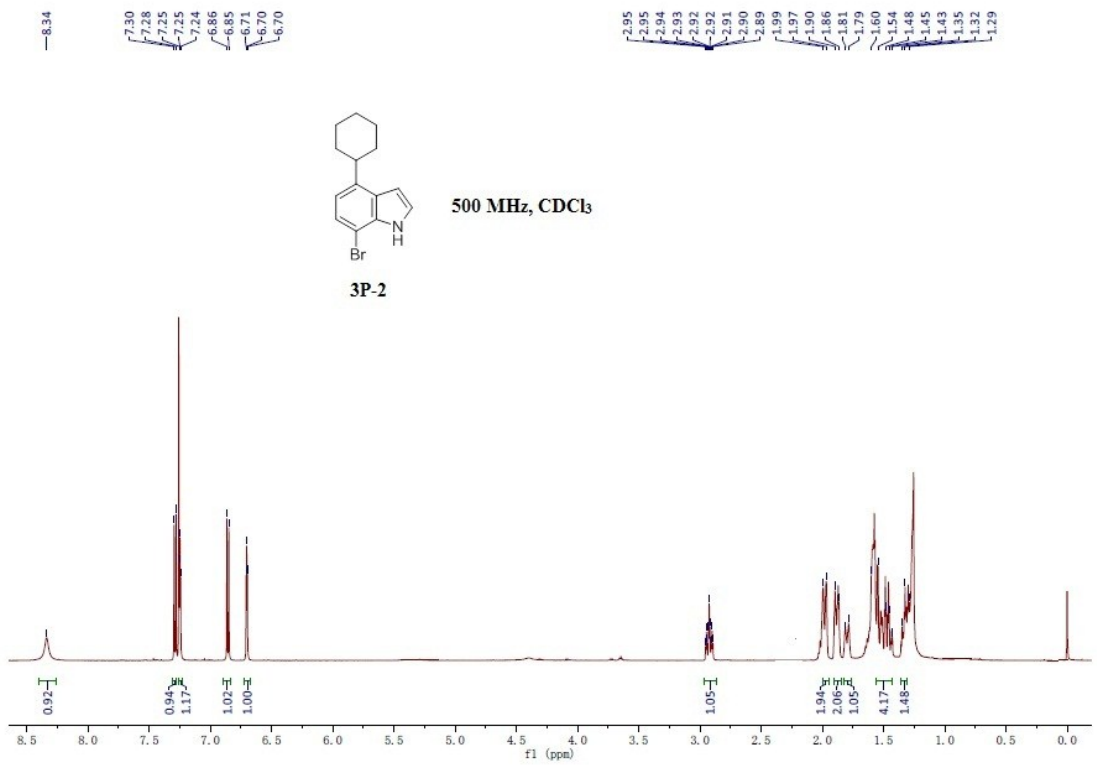

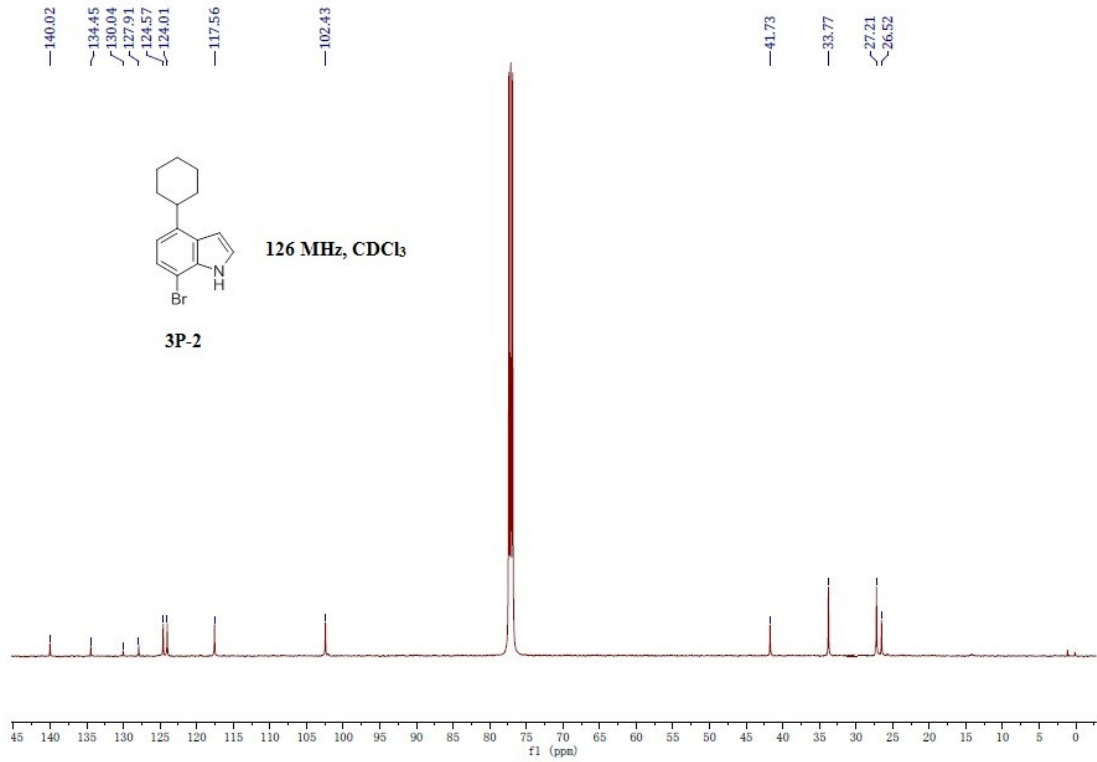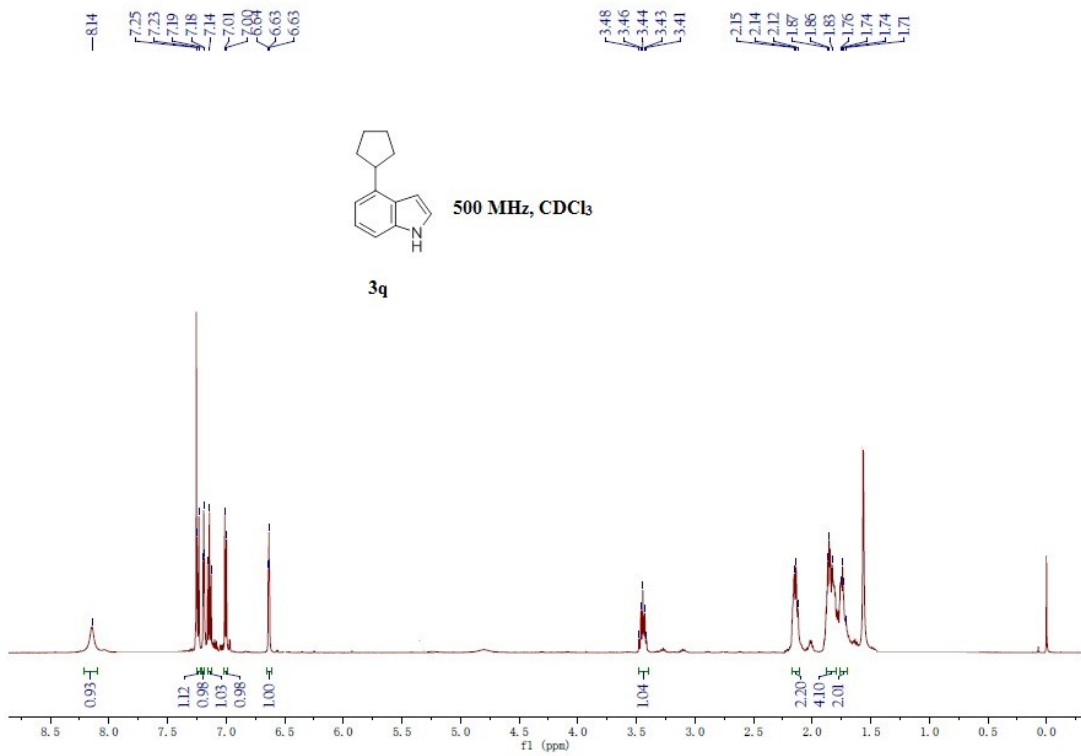

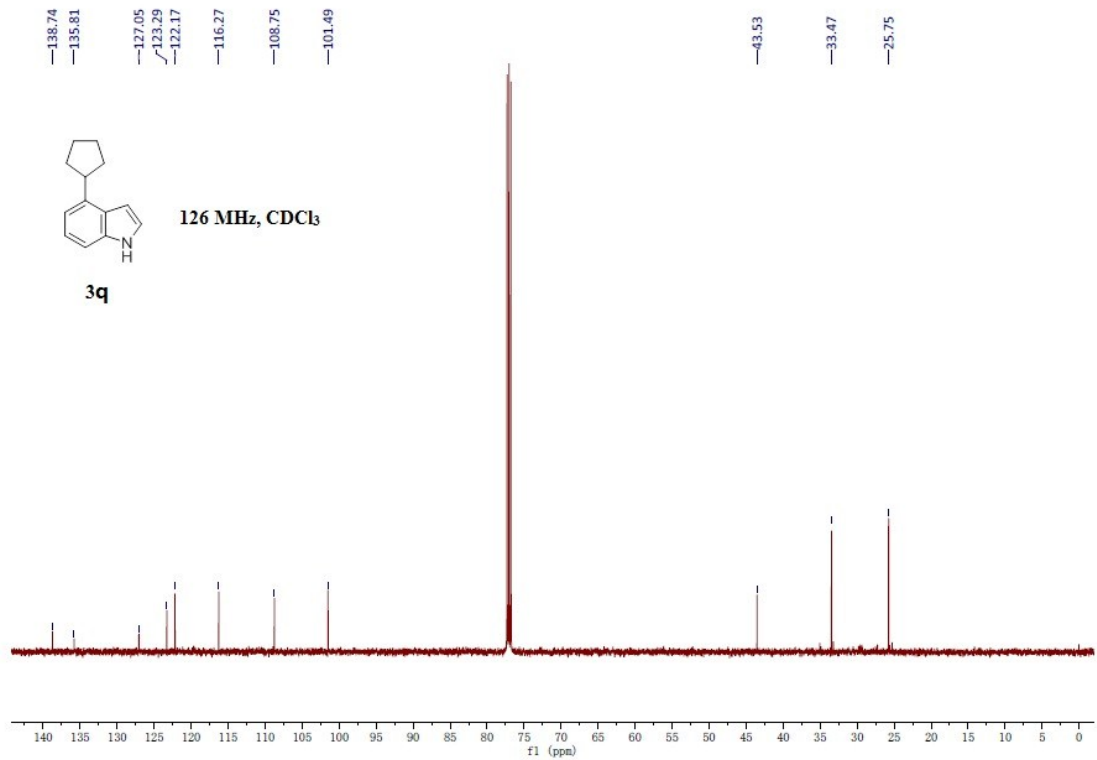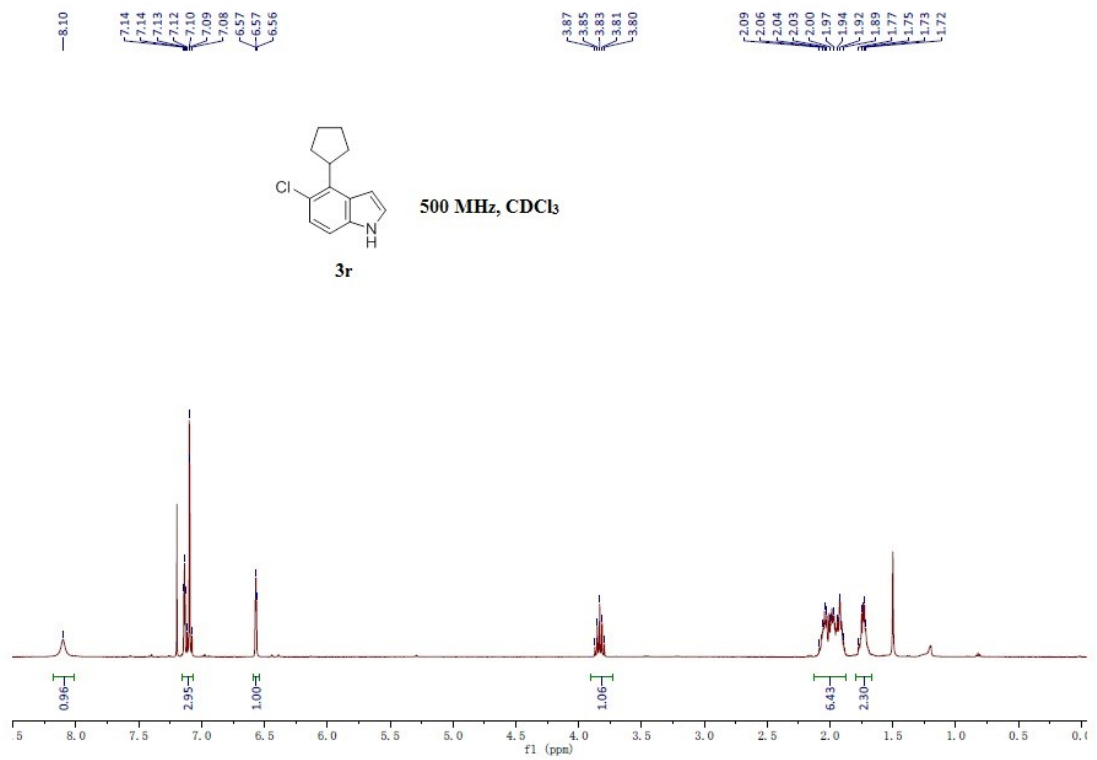



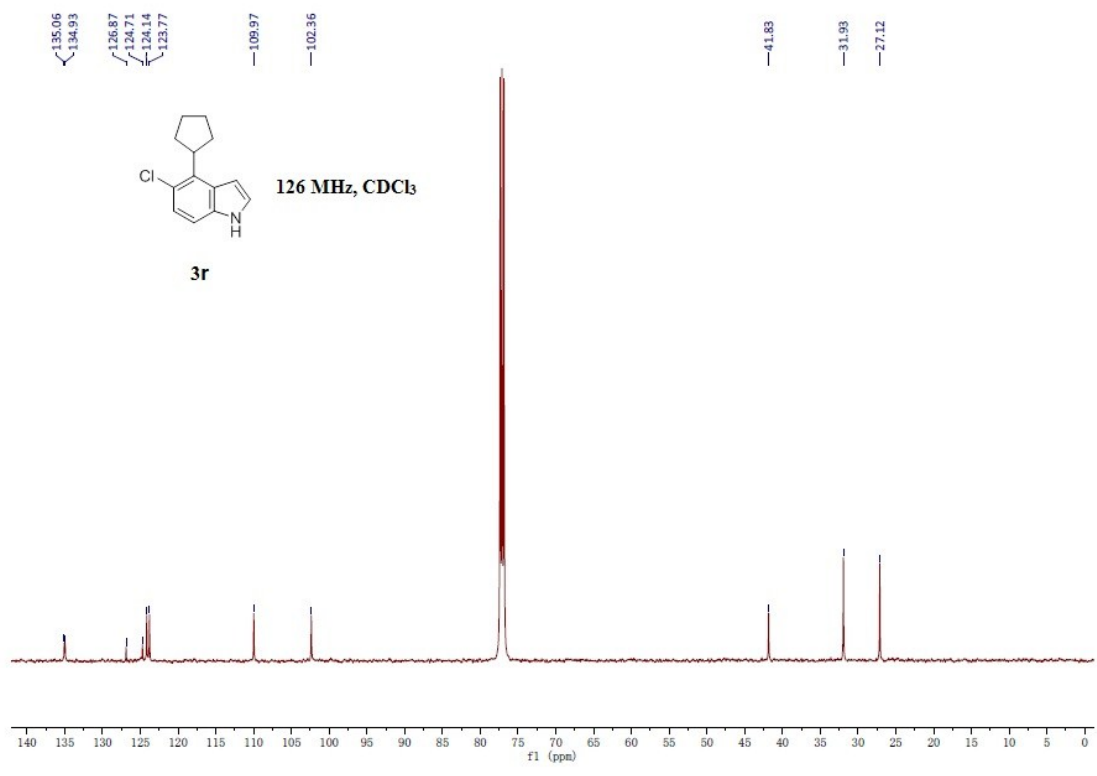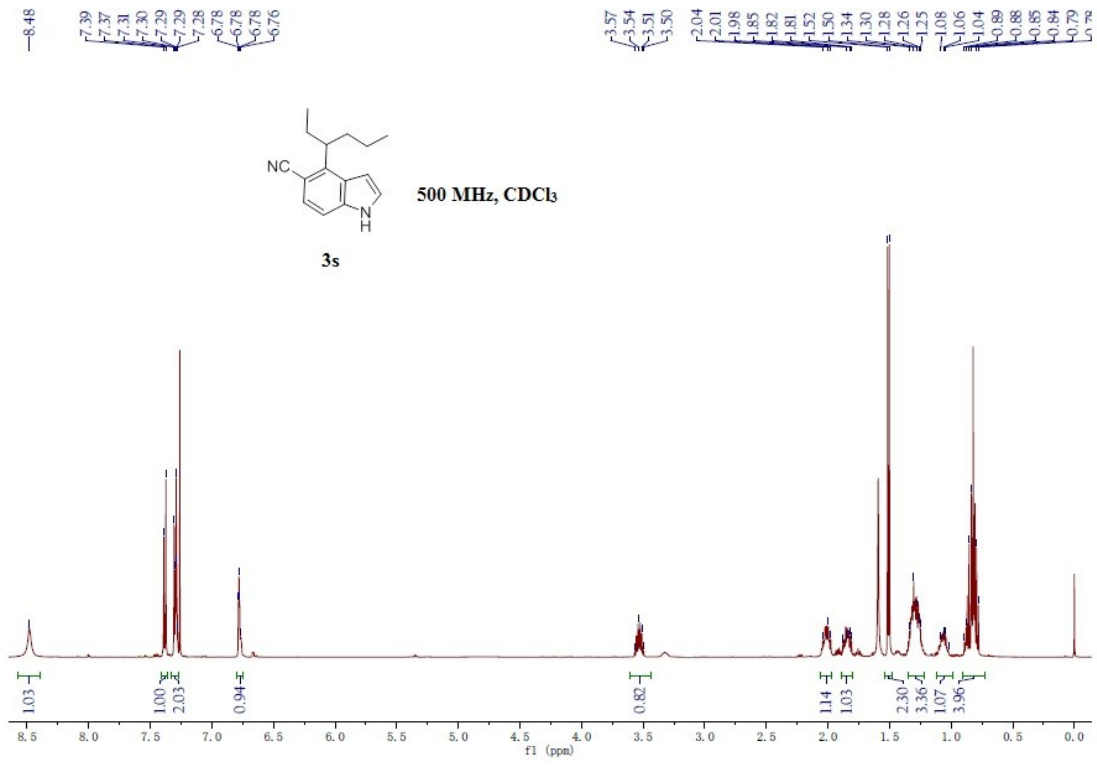

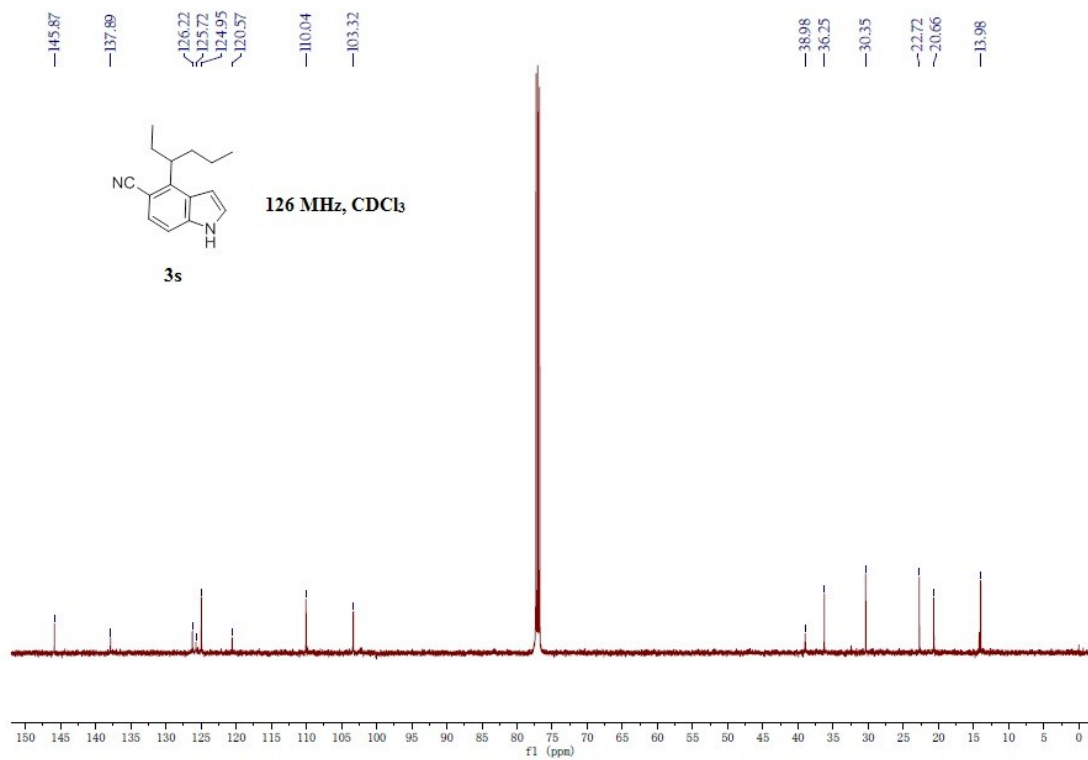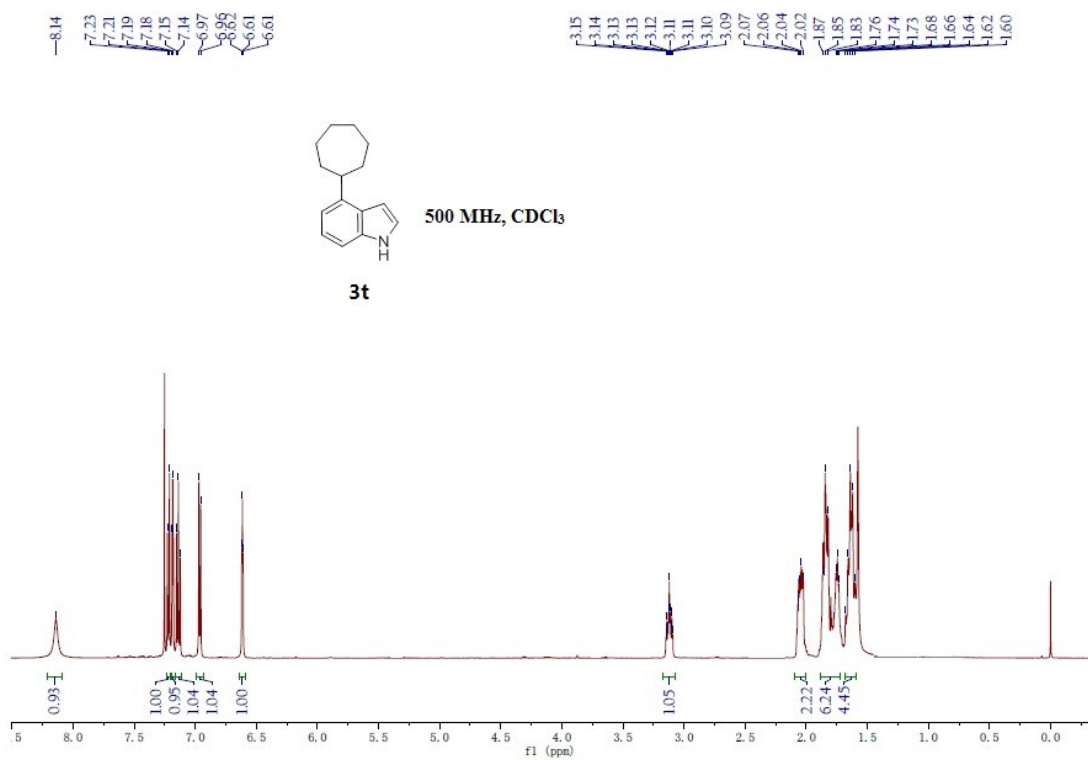

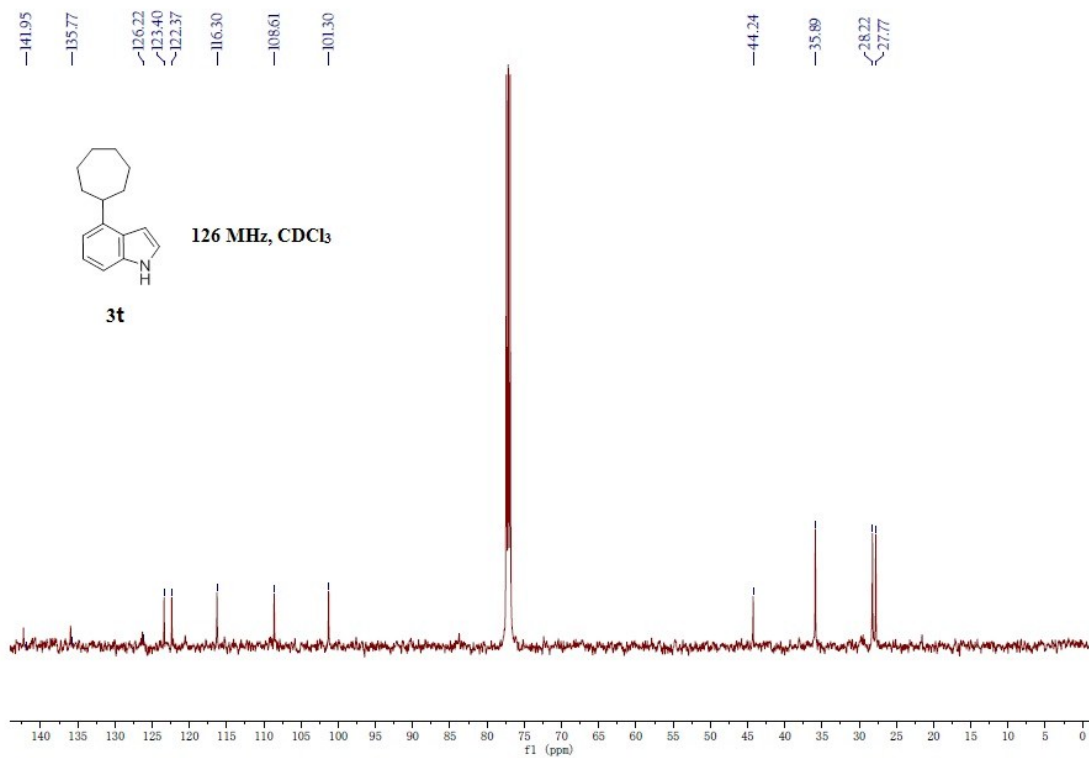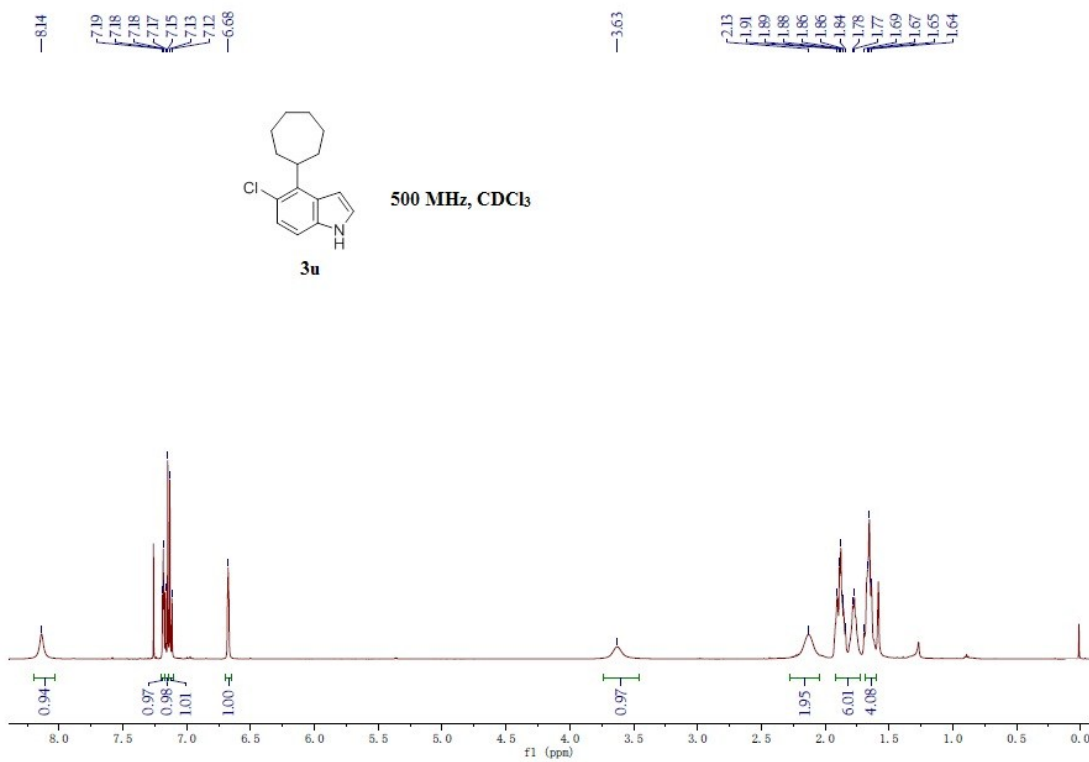

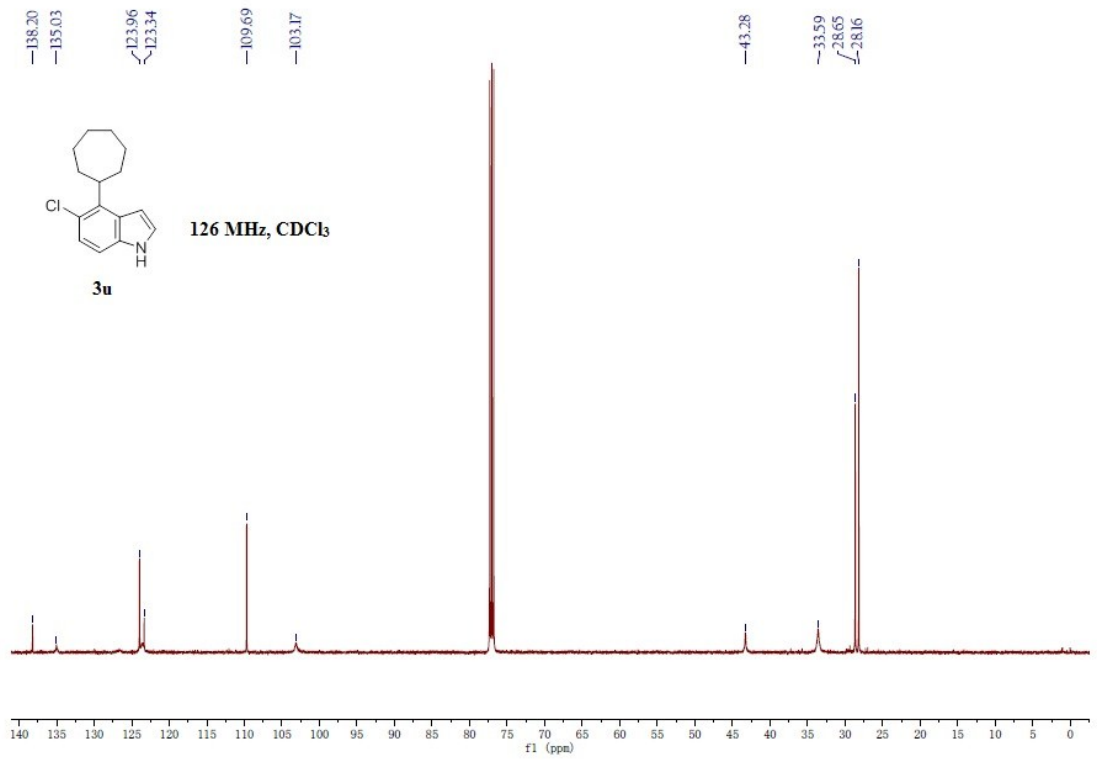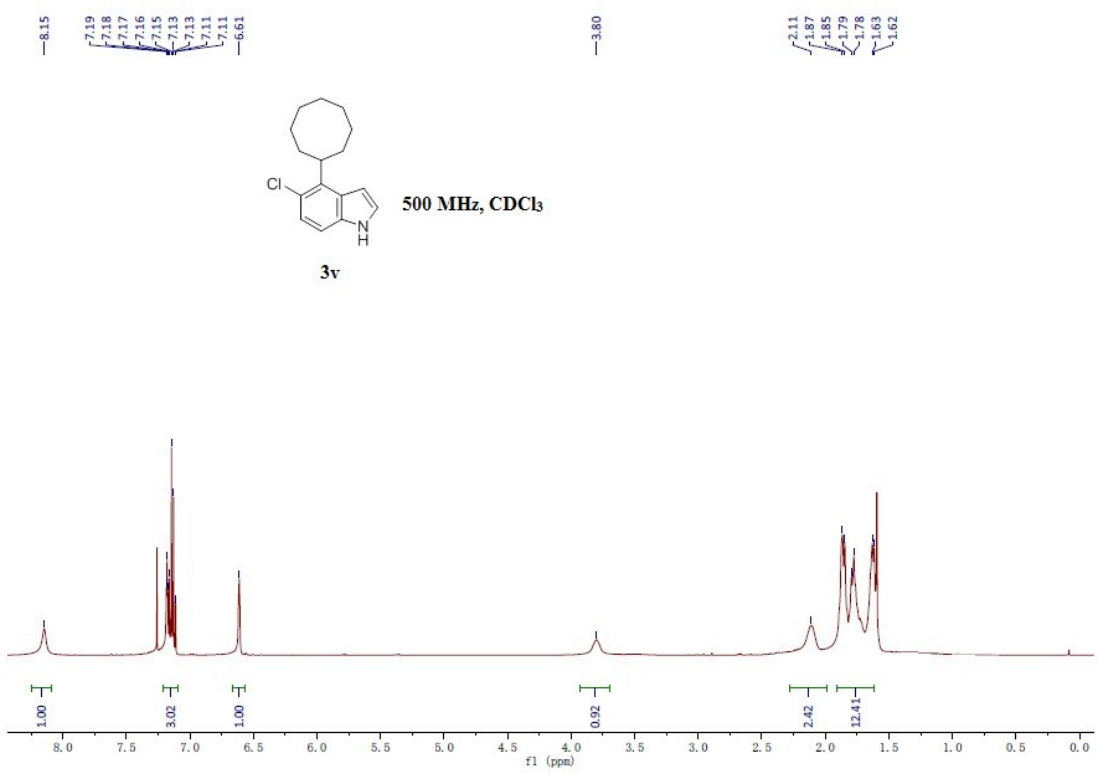

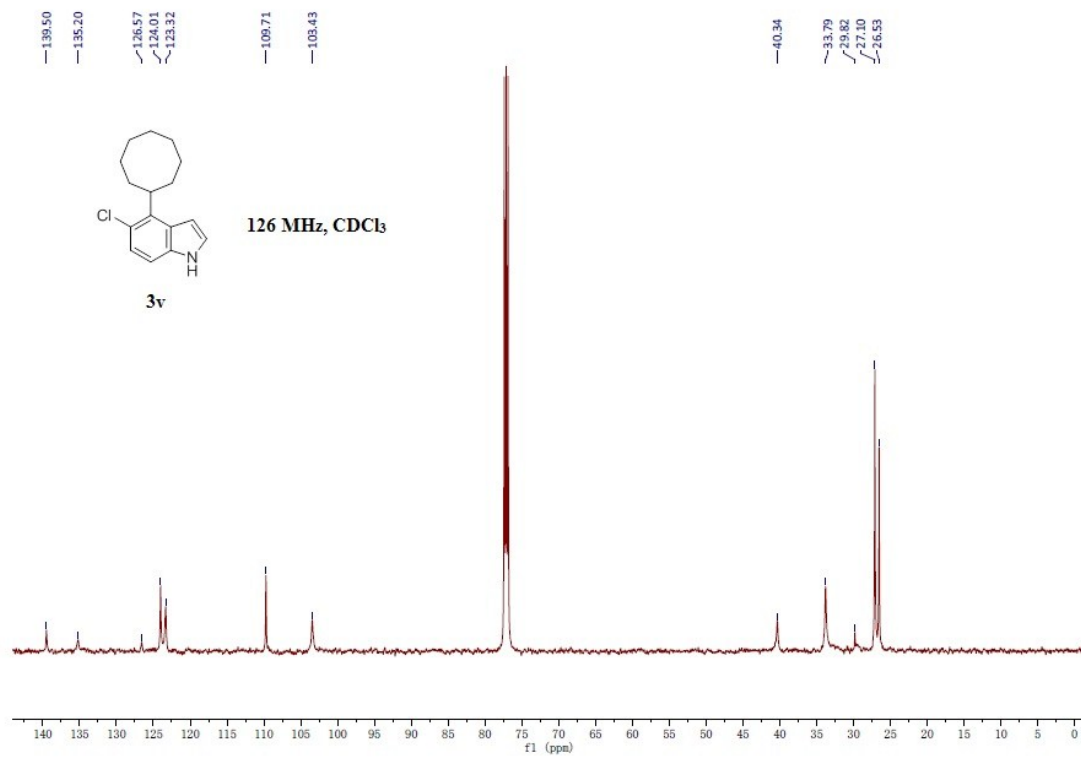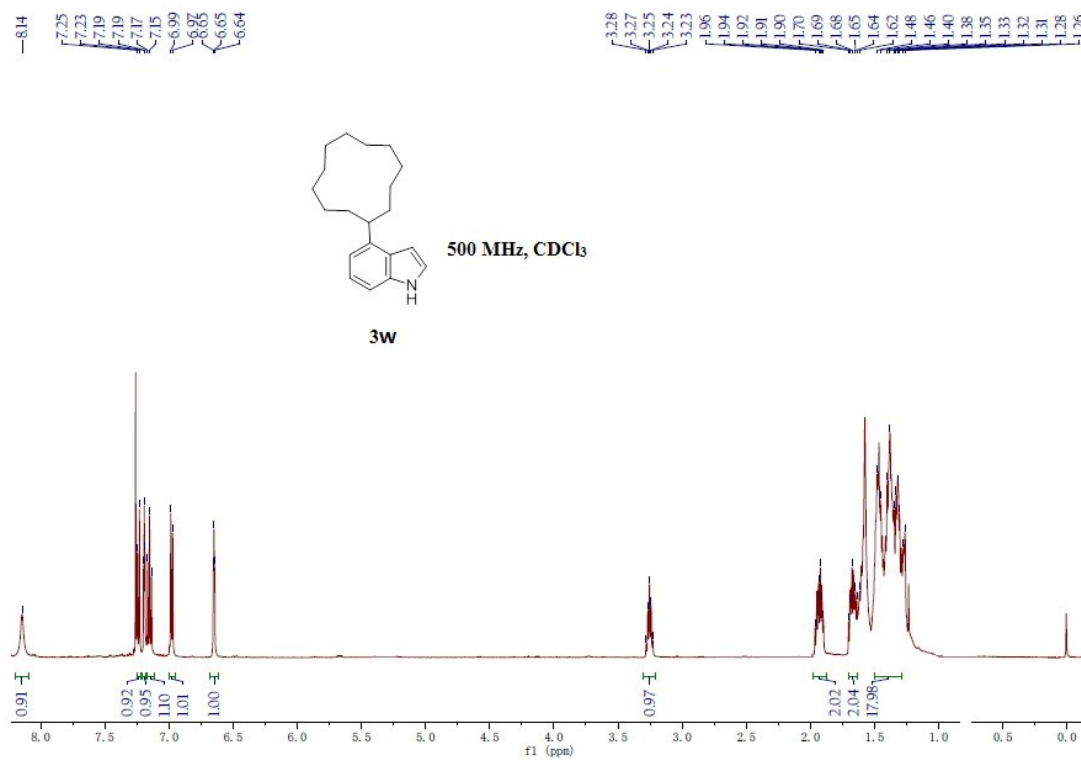

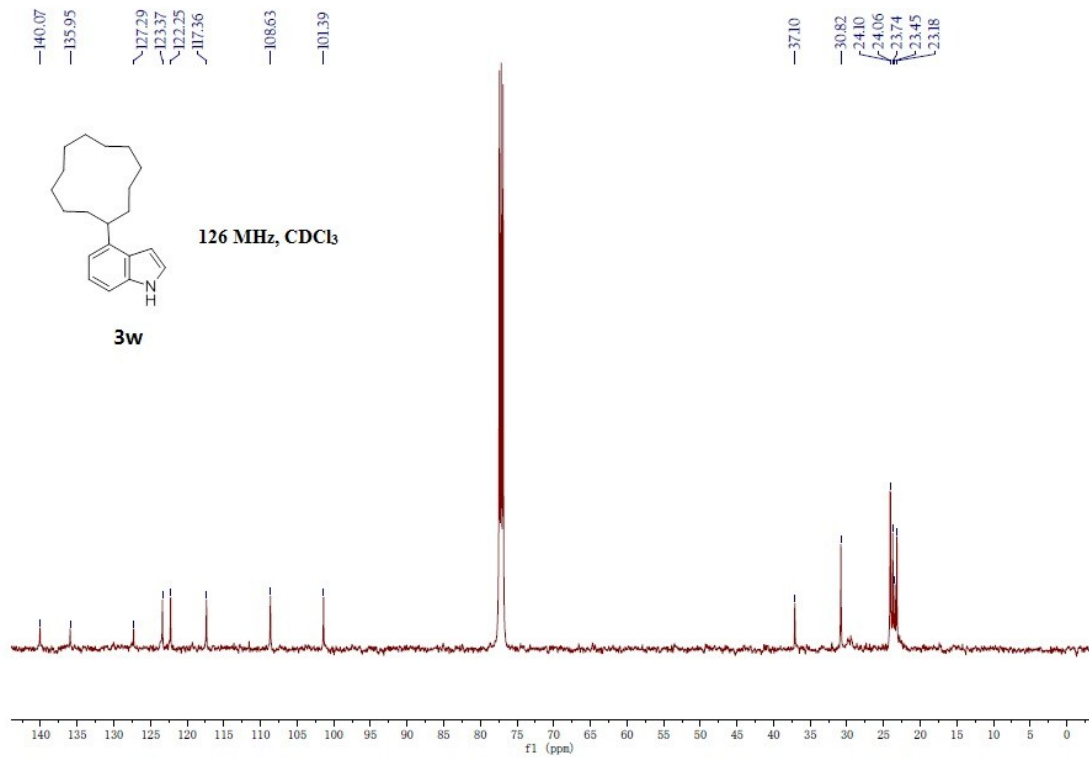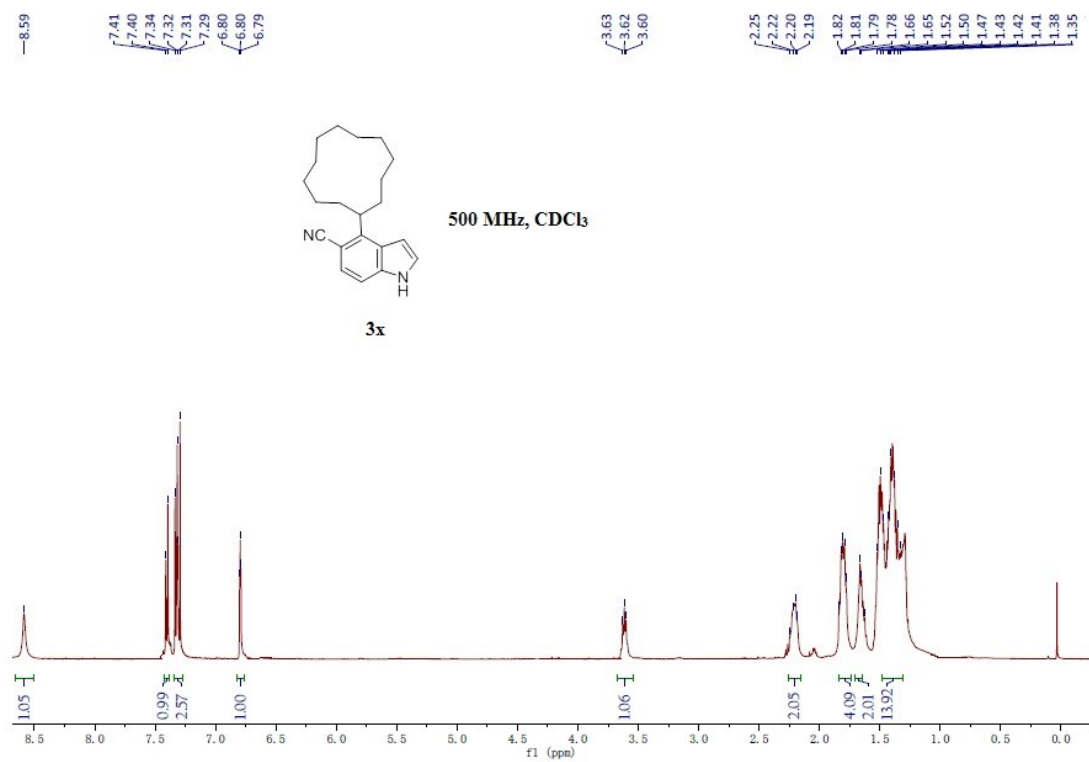

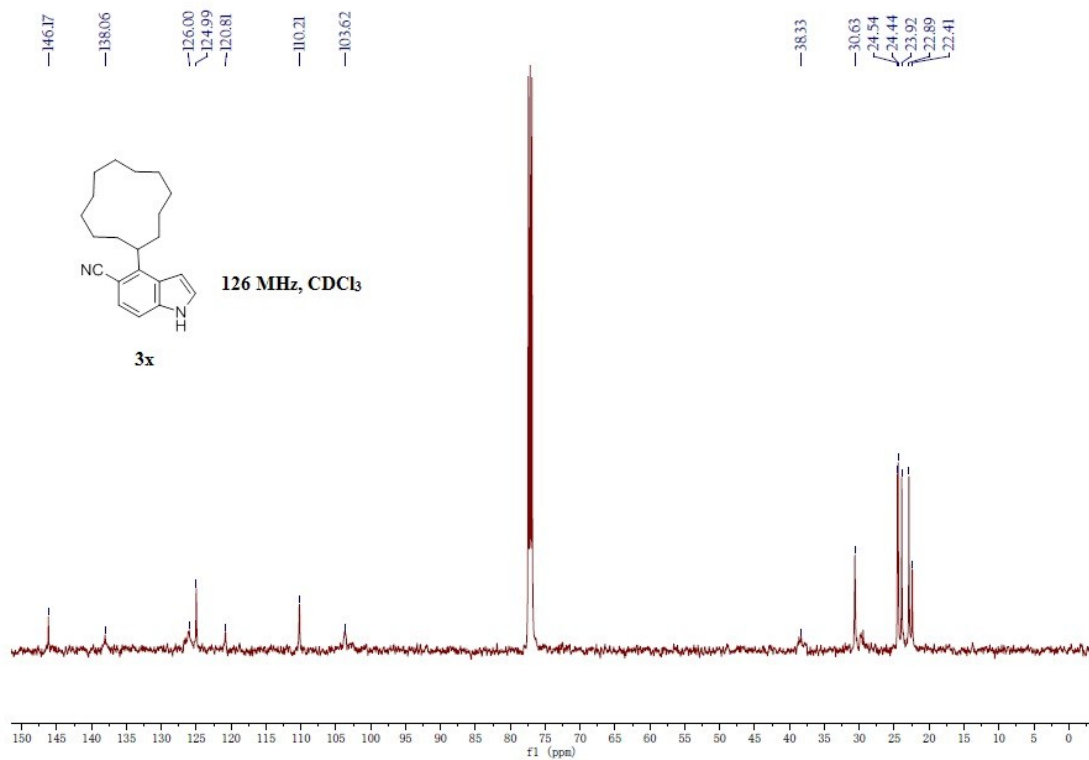

#### 4. Crystallographic Data

X-ray crystal structure of compound **3e**

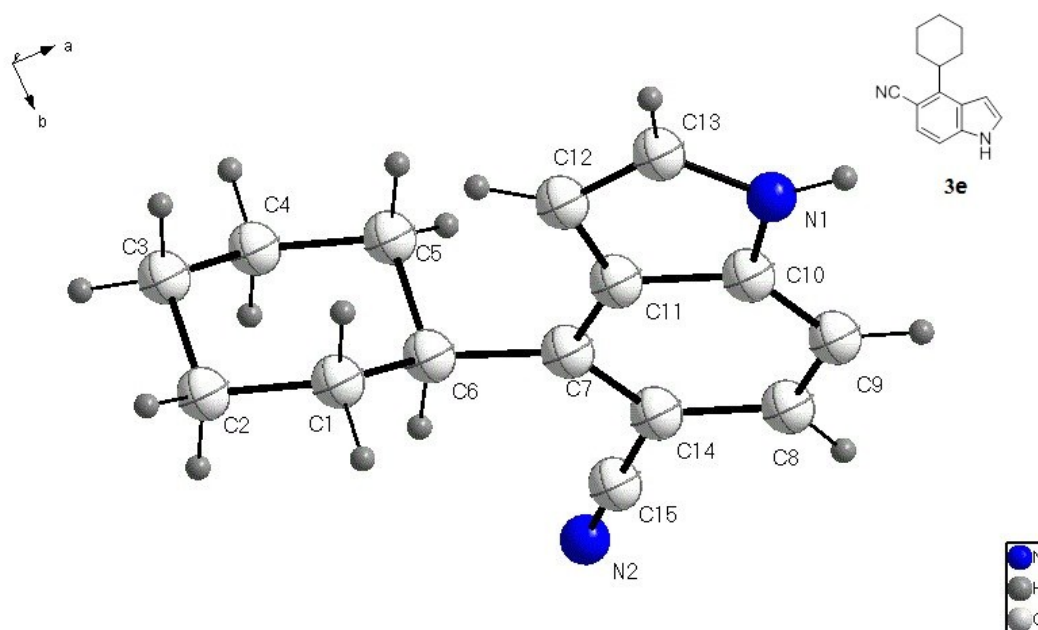

**Table 1.** Crystal data and structure refinement for compound **3e**.

|                                                     |                                                |
|-----------------------------------------------------|------------------------------------------------|
| complex                                             | <b>3e</b>                                      |
| Formula                                             | C <sub>15</sub> H <sub>16</sub> N <sub>2</sub> |
| Formula weight                                      | 224.30                                         |
| Crystal system                                      | Monoclinic                                     |
| space group                                         | <i>P</i> 2(1)/ <i>c</i>                        |
| <i>a</i> (Å)                                        | 15.783(3)                                      |
| <i>b</i> (Å)                                        | 12.467(2)                                      |
| <i>c</i> (Å)                                        | 12.928(2)                                      |
| $\alpha$ (°)                                        | 90.00                                          |
| $\beta$ (°)                                         | 102.277(3)                                     |
| $\gamma$ (°)                                        | 90                                             |
| Volume(Å <sup>3</sup> )                             | 2485.6(7)                                      |
| <i>Z</i>                                            | 8                                              |
| <i>T</i> (K)                                        | 293(2)                                         |
| <i>D</i> <sub>calcd</sub> (g/m <sup>3</sup> )       | 1.199                                          |
| <i>F</i> (000)                                      | 960                                            |
| Reflections collected                               | 4370                                           |
| Unique reflections                                  | 3137                                           |
| Goof                                                | 1.042                                          |
| <i>R</i> <sub>1</sub> [ <i>I</i> > 2σ( <i>I</i> )]  | 0.0430                                         |
| <i>wR</i> <sub>2</sub> [ <i>I</i> > 2σ( <i>I</i> )] | 0.1028 <sup>a</sup>                            |
| CCDC NO.                                            | 1402249                                        |

<sup>a</sup>  $w = 1/[\sigma^2(F_0)^2 + (0.0532P)^2 + 0.2324P]$ , where  $P = (F_0^2 + 2F_c^2)/3$ ;

## 5. Theoretic calculation results of **1c** and **1o**.

|           |          |           |            |          |            |        |            |        |
|-----------|----------|-----------|------------|----------|------------|--------|------------|--------|
| Compounds | Breaking | TS energy | Zero point | c-hexane | Zero point | Indole | Zero point | Active |
|-----------|----------|-----------|------------|----------|------------|--------|------------|--------|



|                                                                                                   | bonds            | (hartree)  | energies<br>(hartree) | energies<br>(hartree) | energies<br>(hartree) | energies<br>(hartree) | energies<br>(hartree) | energies<br>(kJ/mol) |
|---------------------------------------------------------------------------------------------------|------------------|------------|-----------------------|-----------------------|-----------------------|-----------------------|-----------------------|----------------------|
| 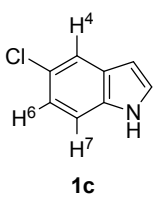 <p><b>1c</b></p> | C-H <sup>4</sup> | -1058.6131 | 0.2785                | -235.2139             | 0.1562                | -823.4131             | 0.1203                | 41.75                |
|                                                                                                   | C-H <sup>6</sup> | -1058.6105 | 0.2785                | -235.2139             | 0.1562                | -823.4131             | 0.1203                | 48.57                |
|                                                                                                   | C-H <sup>7</sup> | -1058.6107 | 0.2785                | -235.2139             | 0.1562                | -823.4131             | 0.1203                | 48.05                |
|  <p><b>1o</b></p> | C-H <sup>4</sup> | -1058.6117 | 0.2785                | -235.2139             | 0.1562                | -823.4131             | 0.1203                | 45.42                |
|                                                                                                   | C-H <sup>5</sup> | -1058.6083 | 0.2785                | -235.2139             | 0.1562                | -823.4131             | 0.1203                | 54.35                |
|                                                                                                   | C-H <sup>7</sup> | -1058.6121 | 0.2786                | -235.2139             | 0.1562                | -823.4131             | 0.1203                | 44.63                |
